# Supplementary material for: The Noncoding RNA MALAT1 Is a Critical Regulator of the Metastasis Phenotype of Lung Cancer Cells
Source: Oxford University Press journal article supplement (doi:10.1158/0008-5472.can-12-2850), 2012-12-15
Supplement: 00085472can122850-sup-can-12-2850tab1.xlsx [file 00085472can122850-sup-can-12-2850tab1.xlsx]

## Sheet: Suppl Table 1
Supplementary Table S1: Transcripts significantly regulated by loss of MALAT1 in A549 lung cancer cells (adj. p-value p<0.05).
p-value (corr)	fold change	Regulation	GenBack Acc#	Gene Symbol	Gene Description	Swissprot Acc#	Transcript Cluster ID
2.1267e-07	35.5703	down	BX538238	MALAT1	metastasis associated lung adenocarcinoma transcript 1 (non-protein coding)	BX538238 // Q9H355	7385515
0.00147966	17.1889	up	M18728	CEACAM6	carcinoembryonic antigen-related cell adhesion molecule 6 (non-specific cross reacting antigen)	NM_002483 // P40199 /// M18728 // P40199 /// M18728 // Q14921 /// M18728 // Q14922	3834379
0.0142129	6.54791	up	AF269087|AK294693	ANKRD30A|ANKRD30B	ankyrin repeat domain 30A | ankyrin repeat domain 30B	NM_001145029 // Q9BXX2 /// AF269087 // Q9BXX3 /// AK294693 // B4DGP1	3242839
4.07935e-05	6.34074	down	AF104266|AF104939|AF104938|AB018329|AK123422|DQ925675|BC031321	LPHN2|LOC729817	latrophilin 2 | similar to mCG50656	NM_012302 // O95490 /// AF104266 // O95490 /// AF104939 // O95490 /// AF104938 // O95490 /// AB018329 // O95490 /// AK123422 // B3KVU1 /// DQ925675 // A5XEI2	2343823
0.000223899	6.21238	down	BC054511	DLC1	deleted in liver cancer 1	NM_182643 // Q96QB1 /// NM_006094 // Q45XF9 /// NM_001164271 // Q96QB1 /// BC054511 // Q96QB1	3125116
0.00995739	5.99918	up	M58569	FGA	fibrinogen alpha chain	NM_000508 // P02671 /// NM_021871 // P02671 /// M58569 // P02671	2790626
0.00161798	5.57836	up	BC107766	FGB	fibrinogen beta chain	NM_005141 // P02675 /// BC107766 // Q32Q65 /// BC107766 // P02675	2748542
0.0140272	5.38253	up	U07969	CDH17	cadherin 17, LI cadherin (liver-intestine)	NM_004063 // B2R778 /// NM_004063 // Q12864 /// NM_001144663 // B2R778 /// NM_001144663 // Q12864 /// U07969 // Q12864 /// U07969 // B2R778	3144859
0.000223899	4.93221	up	BC011949	CA2	carbonic anhydrase II	NM_000067 // P00918 /// BC011949 // P00918	3105600
0.0433839	4.63334	up	BC072457	SPARC	secreted protein, acidic, cysteine-rich (osteonectin)	NM_003118 // B2RDL6 /// NM_003118 // P09486 /// BC072457 // P09486 /// BC072457 // B2RDL6	2882098
0.00300327	4.56355	down	BC144496|U11058|BC137115|BC137137|AB113382|AB113575|U13913|AY040849|U23767|AF025999|U11717|AF118141|BC062659|BX648925|U02632|U09384|AK128392|AK124355|AY445624|AK098326|AK310379|BC009695|CR627384	KCNMA1	potassium large conductance calcium-activated channel, subfamily M, alpha member 1	NM_001014797 // Q59FH2 /// BC144496 // B7ZMF5 /// U11058 // Q12791 /// BC137115 // Q12791 /// BC137137 // Q12791 /// AB113382 // Q12791 /// AB113575 // Q12791 /// U13913 // Q12791 /// AY040849 // Q12791 /// U23767 // Q12791 /// U23767 // Q59FH2 /// AF025999 // Q12791 /// AF025999 // Q59FH2 /// U11717 // Q12791 /// AF118141 // Q12791 /// AF118141 // Q59FH2 /// BC062659 // Q12791 /// U02632 // Q127…	3296046
0.00508275	3.69219	down	AF098807	LHFP	lipoma HMGIC fusion partner	NM_005780 // Q9Y693 /// AF098807 // Q9Y693	3510450
0.0167188	3.56409	down	M22324	ANPEP	alanyl (membrane) aminopeptidase	NM_001150 // P15144 /// NM_001150 // Q59E93 /// M22324 // P15144 /// M22324 // Q59E93	3638607
0.0197272	3.55086	down	AB062057|AK293534|D29808|D10653|AK293178|AK293552|AB102665|BC018036|AF147326	TSPAN7	tetraspanin 7	NM_004615 // P41732 /// AB062057 // P41732 /// AK293534 // B4DEA5 /// D29808 // P41732 /// D10653 // P41732 /// AK293178 // B4DDG0 /// AK293552 // B4DEB8 /// AB102665 // Q7Z3Z6 /// AB102665 // P41732 /// BC018036 // P41732	3974019
0.000321111	3.45665	down	BC073755|BC008813	ANXA8|ANXA8L1|ANXA8L2	annexin A8 | annexin A8-like 1 | annexin A8-like 2	NM_001040084 // B2R939 /// NM_001040084 // Q5VT79 /// NM_001040084 // P13928 /// NM_001098845 // B2R939 /// NM_001098845 // Q5VT79 /// NM_001098845 // P13928 /// NM_001630 // B2R939 /// NM_001630 // Q5VT79 /// NM_001630 // P13928 /// BC073755 // P13928 /// BC073755 // B2R939 /// BC073755 // Q5VT79 /// BC008813 // Q5VT79	3245415
0.00500524	3.45351	down	BC074979	DRD1	dopamine receptor D1	NM_000794 // P21728 /// BC074979 // P21728	2888010
0.00014045	3.44307	down	BC008813|BC073755|BC146955|BC171878|AK096908	ANXA8L2|ANXA8L1|FAM25B|FAM25C|FAM25G|FAM25A|LOC642826	annexin A8-like 2 | annexin A8 | annexin A8-like 1 | family with sequence similarity 25, member B | family with sequence similarity 25, member C | family with sequence similarity 25, member G | family with sequence similarity 25, member A | hypothetical LOC642826	NM_001630 // B2R939 /// NM_001630 // Q5VT79 /// NM_001630 // P13928 /// NM_001040084 // B2R939 /// NM_001040084 // Q5VT79 /// NM_001040084 // P13928 /// NM_001098845 // B2R939 /// NM_001098845 // Q5VT79 /// NM_001098845 // P13928 /// BC008813 // Q5VT79 /// BC073755 // P13928 /// BC073755 // B2R939 /// BC073755 // Q5VT79 /// BC146955 // Q5VTM1 /// BC171878 // Q5VTM1	3245172
0.00611413	3.36393	down	AY358462	GPC6	glypican 6	AY358462 // Q9Y625	3496637
0.00952234	3.34427	down	BC008376	CXCL5	chemokine (C-X-C motif) ligand 5	NM_002994 // Q6I9S7 /// BC008376 // P42830 /// BC008376 // Q6I9S7	2773369
0.0285849	3.26414	up		C12orf27	chromosome 12 open reading frame 27	NR_024345 // Q8N8Z0	3474787
0.00504291	3.2565	up	AK290824|BC007044|BC021674|AK289422|BT007081|CR596270	FGG	fibrinogen gamma chain	NM_000509 // Q7Z664 /// AK290824 // P02679 /// AK290824 // Q7Z664 /// BC007044 // P02679 /// BC007044 // Q7Z664 /// BC021674 // P02679 /// BC021674 // Q7Z664 /// AK289422 // P02679 /// BT007081 // P02679	2790652
0.0452027	3.16087	up	BC117222	SIDT1	SID1 transmembrane family, member 1	NM_017699 // Q9NXL6 /// BC117222 // Q9NXL6	2636483
0.0475388	3.12303	up	U07820	CNTN1	contactin 1	NM_001843 // Q12860 /// NM_175038 // Q12860 /// U07820 // Q12860	3411721
0.00161798	3.11021	up	AF523360	HNMT	histamine N-methyltransferase	NM_006895 // P50135 /// AF523360 // P50135	2507896
0.00161798	3.08699	up	BC142699|BC107771	CFH|CFHR1	complement factor H | complement factor H-related 1	NM_000186 // P08603 /// NM_001014975 // P08603 /// NM_002113 // Q6LBM9 /// NM_002113 // Q03591 /// BC142699 // P08603 /// BC107771 // Q03591 /// BC107771 // Q6LBM9	2373336
0.0255987	3.06348	up	AK295117	NLGN4Y	neuroligin 4, Y-linked	NR_028319 // Q8NFZ3 /// NM_014893 // Q8NFZ3 /// NR_028318 // Q8NFZ3 /// AK295117 // B4DHI3	4030371
0.0409493	3.02201	down	BC026337	GABRE	gamma-aminobutyric acid (GABA) A receptor, epsilon	NM_004961 // P78334 /// BC026337 // Q6PCD2 /// BC026337 // P78334	4026010
0.0133429	2.95914	down	AF468010	CDCP1	CUB domain containing protein 1	NM_022842 // Q9H5V8 /// AF468010 // Q9H5V8	2671728
0.0247169	2.91807	up	AK225871	GPX2	glutathione peroxidase 2 (gastrointestinal)	NM_002083 // P18283	3568603
0.03605	2.88091	up	BC026356	RND1	Rho family GTPase 1	NM_014470 // Q92730 /// BC026356 // Q92730	3453348
0.038135	2.82157	up	AB040902	FLRT3	fibronectin leucine rich transmembrane protein 3	NM_198391 // Q9NZU0 /// NM_013281 // Q8NC95 /// NM_013281 // Q9NZU0 /// AB040902 // Q9NZU0 /// AB040902 // Q8NC95	3898355
0.0220139	2.8054	down	BC018083	TMEM171	transmembrane protein 171	BC018083 // Q8WVE6	2815220
0.0144136	2.755	up	BC026283	APOH	apolipoprotein H (beta-2-glycoprotein I)	NM_000042 // P02749 /// BC026283 // P02749	3767709
0.0433839	2.71872	down	BC077077	DPYSL3	dihydropyrimidinase-like 3	NM_001387 // Q14195 /// BC077077 // Q6DEN2	2880292
0.00366318	2.70485	down	AK055539	LAYN	layilin	AK055539 // Q6UX15	3348568
0.00952234	2.6955	down	AL832572	MOBKL2B	MOB1, Mps One Binder kinase activator-like 2B (yeast)	NM_024761 // Q86TA1 /// AL832572 // Q86TA1	3202316
0.0104794	2.68923	up	AK289448	FGL1	fibrinogen-like 1	AK289448 // Q8NG32	3125993
0.0037876	2.68824	down	AF002020	NPC1	Niemann-Pick disease, type C1	NM_000271 // Q59GR1 /// AF002020 // O15118 /// AF002020 // Q59GR1	3801411
0.000321111	2.66891	down	AY189690|AK130278	NXN|LOC100130876	nucleoredoxin | hypothetical LOC100130876	NM_022463 // Q6DKJ4 /// AY189690 // Q56VW5 /// AY189690 // Q6DKJ4 /// AK130278 // Q6ZP06	3739867
0.0172706	2.65518	up	BC013923|BC041898	SOX2OT	SOX2 overlapping transcript (non-protein coding) | SRY (sex determining region Y)-box 2	NM_003106 // B2R6J0 /// NM_003106 // P48431 /// BC013923 // P48431 /// BC013923 // B2R6J0	2654454
2.36792e-05	2.65432	up	BC157861|BC171855|AF040990|BC112336|BC115022|BC115020|AK297481|AK299920|AK095256|BC115021|BC017743|BC043430	ROBO1	roundabout, axon guidance receptor, homolog 1 (Drosophila)	NM_133631 // Q9Y6N7 /// NM_001145845 // Q9Y6N7 /// BC157861 // B2RXI1 /// BC157861 // Q9Y6N7 /// BC171855 // B2RXI1 /// BC171855 // Q9Y6N7 /// AF040990 // Q9Y6N7 /// BC112336 // Q2M1J3 /// BC112336 // Q9Y6N7 /// BC115022 // Q1RMC7 /// BC115022 // Q9Y6N7 /// BC115020 // Q1RMC8 /// BC115020 // Q9Y6N7 /// AK297481 // B4DMJ0 /// AK299920 // B7Z687	2683763
0.0142133	2.63764	up	AF203977	EHF	ets homologous factor	AF203977 // Q9NZC4	3326461
0.00537742	2.62683	up	AF115926|AY359009|AF088867|AF087879|AF007791|AF038451|BC015503|BT007048|AK296721|AK223067|AK124419	AGR2	anterior gradient homolog 2 (Xenopus laevis)	AF115926 // O95994 /// AF115926 // B2R7D7 /// AY359009 // O95994 /// AF088867 // O95994 /// AF087879 // O95994 /// AF007791 // O95994 /// AF038451 // O95994 /// AF038451 // B2R7D7 /// BC015503 // O95994 /// BC015503 // B2R7D7 /// BT007048 // O95994 /// BT007048 // B2R7D7 /// AK296721 // B4DKU8 /// AK223067 // Q53G64	3039791
0.0129781	2.61897	down	BC000234	NNMT	nicotinamide N-methyltransferase	BC000234 // P40261	3349858
0.00161798	2.55628	down	AF368463	CPM	carboxypeptidase M	NM_001874 // P14384 /// NM_198320 // P14384 /// NM_001005502 // P14384 /// AF368463 // P14384	3461341
0.00688824	2.47762	up	BC040503	TC2N	tandem C2 domains, nuclear	NM_152332 // Q8N9U0 /// NM_001128596 // Q8N9U0 /// NM_001128595 // Q8N9U0 /// BC040503 // Q8N9U0	3576704
0.0425236	2.47641	up	AK301311	VSIG1	V-set and immunoglobulin domain containing 1	NM_001170553 // Q86XK7 /// NM_182607 // Q86XK7 /// AK301311 // Q86XK7	3986647
0.00377836	2.44147	up	AY358777	PARM1|DKFZP564O0823	prostate androgen-regulated mucin-like protein 1 | prostatic androgen-repressed message-1	NM_015393 // Q6UWI2 /// AY358777 // Q6UWI2	2731636
0.00359248	2.42284	up	AJ420562	PKIB	protein kinase (cAMP-dependent, catalytic) inhibitor beta	NM_181795 // Q9C010 /// NM_032471 // Q9C010	2923868
0.00132165	2.41413	up	BX537676	CYP3A5	cytochrome P450, family 3, subfamily A, polypeptide 5	NM_000777 // B2R9K2 /// NM_000777 // Q53GC3 /// BX537676 // Q7Z3N0 /// BX537676 // B2R9K2 /// BX537676 // Q53GC3	3063406
0.00176793	2.41249	down	AF178532	BACE2	beta-site APP-cleaving enzyme 2	NM_012105 // Q9Y5Z0 /// NM_138992 // Q9Y5Z0 /// NM_138991 // Q9Y5Z0 /// AF178532 // Q9Y5Z0	3921933
0.00684348	2.4111	up	AK096393	DIRAS3	DIRAS family, GTP-binding RAS-like 3		2417362
0.00161798	2.39845	down	AK094560	SNAP25	synaptosomal-associated protein, 25kDa	NM_003081 // P60880 /// NM_130811 // P60880 /// AK094560 // P60880	3876245
0.00044972	2.39332	down	BC039234	PAQR5	progestin and adipoQ receptor family member V	NM_001104554 // Q9NXK6 /// NM_017705 // Q9NXK6 /// BC039234 // Q9NXK6	3599758
0.00952234	2.36439	down	BC030666	RNF182	ring finger protein 182	NM_001165032 // Q8N6D2 /// NM_152737 // Q8N6D2 /// NM_001165033 // Q8N6D2 /// BC030666 // Q8N6D2	2895792
0.00190177	2.2034	down	BC101258|AK124578	RNF212|LOC100132787	ring finger protein 212 | hypothetical protein LOC100132787	NM_001131034 // Q495C1 /// NM_194439 // Q495C1 /// BC101258 // Q495C1	2756892
0.00611413	2.20165	up	BC022480	PDE1A	phosphodiesterase 1A, calmodulin-dependent	NM_005019 // Q9Y633 /// NM_005019 // Q9Y246 /// BC022480 // P54750 /// BC022480 // Q9Y633 /// BC022480 // Q9Y246	2590582
0.0102991	2.1889	down	AY358787|AF358258|BC038710|AY040087|AK126660|AK125013|AL355689|CR600031	C21orf63	chromosome 21 open reading frame 63	AY358787 // P58658 /// AF358258 // P58658 /// BC038710 // P58658 /// AY040087 // P58658 /// AK126660 // Q6ZTF6 /// AK125013 // B3KWG0	3918104
0.00945622	2.17814	up	BC105009|BC105011|AB307704|CR542091|Z49826|BC054009	HNF4G	hepatocyte nuclear factor 4, gamma	NM_004133 // Q14541 /// BC105009 // Q14541 /// BC105011 // Q14541 /// AB307704 // B6ZGT4 /// AB307704 // Q14541 /// CR542091 // Q6FGL6 /// CR542091 // Q14541 /// Z49826 // Q14541 /// BC054009 // Q7Z5U9	3103818
0.0104794	2.17046	up	BC027592	TJP2	tight junction protein 2 (zona occludens 2)	NM_004817 // Q9UDY2 /// NM_201629 // Q9UDY2 /// BC027592 // Q9UDY2	3173880
0.00308558	2.16675	down	BC037268	PRKCH	protein kinase C, eta	BC037268 // P24723	3538893
0.0311508	2.16232	up	AK056254	KRT4	keratin 4	NM_002272 // P19013 /// AK056254 // P19013	3455865
0.0109128	2.14997	down	AK127663	PTGES	prostaglandin E synthase	NM_004878 // Q5SZC0	3227070
0.00611413	2.12203	down	BC036034	LPAR1	lysophosphatidic acid receptor 1	NM_057159 // Q5VZX0 /// NM_057159 // Q92633 /// NM_001401 // Q5VZX0 /// NM_001401 // Q92633 /// BC036034 // Q92633 /// BC036034 // Q5VZX0	3220384
0.00783835	2.09963	down	AF070674	BIRC3	baculoviral IAP repeat-containing 3	AF070674 // Q13489	3346548
0.00147966	2.09478	up	BC037733|AF215636|BC035893|AF226614|AK292146|AF231121|CR533564|AF147322|DQ065764|DQ065760|BX537503|AK023574|AF171087	SLC40A1	solute carrier family 40 (iron-regulated transporter), member 1	NM_014585 // Q9NP59 /// NM_014585 // Q6FI62 /// NM_014585 // Q9NUS1 /// NM_014585 // Q4PNE6 /// NM_014585 // Q53FP6 /// BC037733 // Q9NP59 /// BC037733 // Q6FI62 /// BC037733 // Q9NUS1 /// BC037733 // Q4PNE6 /// BC037733 // Q53FP6 /// AF215636 // Q9NP59 /// AF215636 // Q6FI62 /// AF215636 // Q9NUS1 /// AF215636 // Q4PNE6 /// AF215636 // Q53FP6 /// BC035893 // Q9NP59 /// BC035893 // Q6FI62 /// BC0…	2591837
0.0218837	2.08065	up	BX537422	PCDH9	protocadherin 9	NM_203487 // Q9HC56 /// NM_020403 // Q9HC56 /// BX537422 // Q9HC56	3516639
0.0476148	2.08029	up	BC126346	BCAS1	breast carcinoma amplified sequence 1	NM_003657 // B2RCQ5 /// BC126346 // O75363 /// BC126346 // B2RCQ5	3910360
0.017968	2.07871	down	AF285167	ABCA1	ATP-binding cassette, sub-family A (ABC1), member 1	NM_005502 // Q9NS76 /// NM_005502 // O95477 /// AF285167 // O95477 /// AF285167 // Q9NS76	3218528
0.00763563	2.06628	up	BC107771|BC016755|BC058009|BC070259|M65292|M65293|AK298459|BC020687|AK290830|AK291395|BC020680|BC029390|AK311681	CFHR3|CFHR1	complement factor H-related 3 | complement factor H-related 1 | complement factor H	NM_021023 // Q02985 /// NM_002113 // Q6LBM9 /// NM_002113 // Q03591 /// NM_001166624 // Q02985 /// NM_000186 // P08603 /// BC107771 // Q03591 /// BC107771 // Q6LBM9 /// BC016755 // Q03591 /// BC016755 // Q6LBM9 /// BC058009 // Q02985 /// BC070259 // Q6NSD3 /// M65292 // Q03591 /// M65292 // Q6LBM9 /// M65293 // Q03591 /// M65293 // Q6LBM9 /// AK298459 // B4DPR0 /// AK298459 // Q02985 /// BC020687…	2373406
0.00959701	2.06534	up	AK302366|BC017296|AF086251|AF086504	SESN3	sestrin 3	NM_144665 // P58005 /// AK302366 // B7Z7P9 /// BC017296 // P58005 /// AF086251 // P58005 /// AF086504 // P58005	3387259
0.0140065	2.06364	down	BC021117	CSF1	colony stimulating factor 1 (macrophage)	NM_000757 // Q59H07 /// NM_172212 // P09603 /// NM_172210 // Q59H07 /// NM_172211 // Q59H07 /// BC021117 // P09603	2351063
0.0041386	2.06086	down	AF249278|AF202977|BC117359|BC143554|BC050689|AK299550|AK316070|AK299741	KCNQ5	potassium voltage-gated channel, KQT-like subfamily, member 5	NM_001160133 // Q9NR82 /// NM_001160132 // Q9NR82 /// NM_019842 // Q9NR82 /// NM_001160130 // Q9NR82 /// NM_001160134 // Q9NR82 /// AF249278 // Q9NR82 /// AF202977 // Q9NR82 /// BC117359 // Q9NR82 /// BC143554 // Q9NR82 /// BC050689 // Q9NR82 /// AK299550 // B4DS33 /// AK299550 // Q9NR82 /// AK316070 // B7Z9V5 /// AK316070 // Q9NR82 /// AK299741 // B4DSH4 /// AK299741 // Q9NR82	2913277
0.00611413	2.05855	up	BC063291	DSC2	desmocollin 2	NM_004949 // Q63HM4 /// NM_004949 // Q02487 /// NM_024422 // Q63HM4 /// NM_024422 // Q02487 /// BC063291 // Q02487 /// BC063291 // Q63HM4	3802980
0.0107104	2.05695	down	AY326422	ASAM	adipocyte-specific adhesion molecule	NM_024769 // Q9H6B4 /// AY326422 // Q9H6B4	3395464
0.0207584	2.05086	up	M64788|BC035030|BC054490|AB003930	RAP1GAP	RAP1 GTPase activating protein	NM_001145657 // P47736 /// NM_002885 // P47736 /// M64788 // P47736 /// BC035030 // Q49AP2 /// BC054490 // Q7Z5S8 /// AB003930 // Q9UQ51	2400655
0.000733834	2.03185	down	AB085789	SLC16A2	solute carrier family 16, member 2 (monocarboxylic acid transporter 8)	NM_006517 // P36021 /// AB085789 // P36021	3981959
0.00355081	2.01389	down	BC062545	DUSP5	dual specificity phosphatase 5	NM_004419 // Q59EI8 /// BC062545 // Q16690 /// BC062545 // Q59EI8	3263743
0.0308412	1.99093	down	BC030622|AK123197	ANKRD29	ankyrin repeat domain 29	NM_173505 // Q8N6D5 /// BC030622 // Q8N6D5 /// AK123197 // Q8N6D5	3801492
0.0232089	1.98927	up	AY280459	SLC12A2|KDELC1	solute carrier family 12 (sodium/potassium/chloride transporters), member 2 | KDEL (Lys-Asp-Glu-Leu) containing 1	NM_001046 // P55011 /// AY280459 // Q53ZR1 /// AY280459 // P55011	2827525
0.0130314	1.98668	up	BC053657	ST8SIA4	ST8 alpha-N-acetyl-neuraminide alpha-2,8-sialyltransferase 4	BC053657 // Q92187	2868904
0.0103484	1.9754	up	BX538100	NRG4	neuregulin 4	NM_138573 // Q0P6N5 /// NM_138573 // Q68D87 /// BX538100 // Q7Z663	3633699
0.0197843	1.96404	up	FJ236304|BC015520	ANG|RNASE4	angiogenin, ribonuclease, RNase A family, 5 | ribonuclease, RNase A family, 4	NM_001145 // Q53X86 /// NM_002937 // Q53XB4 /// FJ236304 // Q53X86 /// BC015520 // P34096 /// BC015520 // Q53XB4	3527597
0.0130314	1.95561	up	BC030010	EPS8	epidermal growth factor receptor pathway substrate 8	BC030010 // Q12929	3445908
0.0129605	1.95439	up	AF309774	POF1B	premature ovarian failure, 1B	NM_024921 // A8K2U5 /// NM_024921 // Q8WVV4 /// AF309774 // Q8WVV4 /// AF309774 // A8K2U5	4014191
0.00355081	1.9528	down	AF163475	PART1	prostate androgen-regulated transcript 1 (non-protein coding)		2811145
0.0472579	1.95179	up	BC026254	INSL4	insulin-like 4 (placenta)	BC026254 // Q14641	3161042
0.0041386	1.95093	down	BC093869	CACNG7	calcium channel, voltage-dependent, gamma subunit 7	BC093869 // P62955	3841134
0.0217058	1.95091	up	BC036390	GALNT4	UDP-N-acetyl-alpha-D-galactosamine:polypeptide N-acetylgalactosaminyltransferase 4 (GalNAc-T4)	NM_003774 // B2R775 /// BC036390 // Q8N4A0 /// BC036390 // B2R775	3464967
0.0247169	1.92943	up	BC003636	ARRB1	arrestin, beta 1	NM_004041 // P49407 /// NM_020251 // P49407 /// BC003636 // P49407	3382216
0.0476111	1.92224	up	AK293819	CPLX2	complexin 2	NM_001008220 // Q6PUV4 /// AK293819 // B4DEW3 /// AK293819 // Q6PUV4	2842194
0.0333191	1.90515	down	AK225769	ABLIM3	actin binding LIM protein family, member 3	NM_014945 // O94929 /// AK225769 // O94929	2834863
0.0492112	1.887	up	AK290281	ANXA13	annexin A13	NM_001003954 // P27216 /// NM_001003954 // Q53FB5 /// NM_004306 // P27216 /// NM_004306 // Q53FB5 /// AK290281 // A8K2L6 /// AK290281 // P27216 /// AK290281 // Q53FB5	3151719
0.0142571	1.87326	down	BC015484	CALB2	calbindin 2	NM_001740 // P22676 /// NR_027910 // P22676 /// NM_007088 // P22676 /// BC015484 // P22676	3667508
0.0364954	1.8726	down	AF181862	GPRC5B	G protein-coupled receptor, family C, group 5, member B	NM_016235 // Q9NZH0 /// AF181862 // Q9NZH0	3683377
0.0191516	1.85068	down	BC002844	NFKB2	nuclear factor of kappa light polypeptide gene enhancer in B-cells 2 (p49/p100)	NM_001077494 // Q00653 /// NM_002502 // Q00653 /// BC002844 // Q00653	3261643
0.0037876	1.84745	up	BC032848	RHOBTB1	Rho-related BTB domain containing 1	NR_024556 // O94844 /// NM_014836 // O94844 /// NR_024555 // O94844 /// NR_024554 // O94844 /// BC032848 // O94844	3291151
0.0171106	1.8383	down	BC026069	RAGE	renal tumor antigen	NM_014226 // B2R6Z4 /// BC026069 // Q49A77	3580234
0.0052632	1.82804	up	AK075342	C12orf39	chromosome 12 open reading frame 39	AK075342 // Q9BT56	3407849
0.000933074	1.82225	down	AY260577	FLVCR2	feline leukemia virus subgroup C cellular receptor family, member 2	NM_017791 // Q9UPI3 /// AY260577 // Q9UPI3	3544625
0.00999021	1.81778	up	AK295491	SPP1	secreted phosphoprotein 1	AK295491 // B7Z351 /// AK295491 // B2RDA1 /// AK295491 // Q4W597 /// AK295491 // A6XMV6 /// AK295491 // P10451 /// AK295491 // C4B6Q2 /// AK295491 // Q3LGB0	2735027
0.0274029	1.81228	up	BC058917	SYT1	synaptotagmin I	NM_001135805 // Q6AI31 /// NM_005639 // Q6AI31 /// NM_001135806 // Q6AI31 /// BC058917 // P21579 /// BC058917 // Q6AI31	3423622
0.00812361	1.80814	down	AY141974|AF302785	MFGE8|QTRT1	milk fat globule-EGF factor 8 protein | queuine tRNA-ribosyltransferase 1	NM_005928 // Q08431 /// NM_005928 // B3KTQ2 /// NM_001114614 // Q08431 /// NM_001114614 // B3KTQ2 /// AY141974 // Q08431 /// AY141974 // B3KTQ2	3638204
0.00398508	1.80753	down	AB058770|AK021929	KIRREL3|ST3GAL4	kin of IRRE like 3 (Drosophila) | ST3 beta-galactoside alpha-2,3-sialyltransferase 4	AB058770 // Q8IZU9 /// AK021929 // Q9HAA9	3397003
0.0097361	1.80667	up	U13616	ANK3	ankyrin 3, node of Ranvier (ankyrin G)	NM_001149 // Q9H0P5 /// NM_001149 // Q8NAK2 /// U13616 // Q12955	3290875
0.0142571	1.80472	down	BC052575	COL6A1	collagen, type VI, alpha 1	NM_001848 // Q05BT9 /// NM_001848 // Q8TBN2 /// NM_001848 // P12109 /// BC052575 // P12109 /// BC052575 // Q05BT9 /// BC052575 // Q8TBN2	3924372
0.00519299	1.79861	up	J04449	CYP3A4	cytochrome P450, family 3, subfamily A, polypeptide 4	NM_017460 // P08684 /// J04449 // P08684 /// J04449 // Q6GRK0	3063501
0.0452027	1.79738	up	AK297025	FGD4	FYVE, RhoGEF and PH domain containing 4	NM_139241 // Q96M96 /// AK297025 // B7Z493	3410614
0.0249209	1.79356	down	AY236494	TMC5	transmembrane channel-like 5	NM_001105248 // Q6UXY8 /// NM_001105248 // B3KSM9 /// NM_024780 // Q6UXY8 /// NM_024780 // B3KY88 /// NM_001105249 // Q6UXY8 /// NM_001105249 // B3KSM9 /// AY236494 // Q6UXY8 /// AY236494 // B3KY88	3650953
0.0277562	1.79201	up	AF340151	SH3BGRL2	SH3 domain binding glutamic acid-rich protein like 2	NM_031469 // Q9UJC5 /// AF340151 // Q9UJC5	2914693
0.00179811	1.7914	up	AK025301	USP53	ubiquitin specific peptidase 53	NM_019050 // Q70EK8 /// NM_019050 // Q9H9I0	2741236
0.00812361	1.79113	down	AK124772	TBC1D2	TBC1 domain family, member 2	NM_018421 // Q8WYT1 /// NM_018421 // B3KY99 /// AK124772 // B3KWD1 /// AK124772 // Q9H6A2	3217194
0.0457911	1.78715	down	AK092545	LY6K	lymphocyte antigen 6 complex, locus K		3119213
0.00132165	1.78137	down	AY358347	CCBE1	collagen and calcium binding EGF domains 1	NM_133459 // Q6UXH8 /// AY358347 // Q6UXH8	3810542
0.0221556	1.77846	down	AB209658	ITGA3	integrin, alpha 3 (antigen CD49C, alpha 3 subunit of VLA-3 receptor)	NM_002204 // P26006 /// NM_005501 // P26006 /// AB209658 // Q59F03 /// AB209658 // P26006	3726154
0.0142571	1.77334	down	BC010659|AY358758|AB078144|AK298735|AK122747|AK022753|AK024039|AK309417	GALNT14	UDP-N-acetyl-alpha-D-galactosamine:polypeptide N-acetylgalactosaminyltransferase 14 (GalNAc-T14)	NM_024572 // Q68VI9 /// NM_024572 // Q96FL9 /// BC010659 // Q96FL9 /// BC010659 // Q68VI9 /// AY358758 // Q96FL9 /// AY358758 // Q68VI9 /// AB078144 // Q96FL9 /// AB078144 // Q68VI9 /// AK298735 // B7Z5C5 /// AK122747 // B3KV89 /// AK022753 // Q96FL9 /// AK024039 // Q96FL9	2546874
0.0104794	1.75676	down	BC036107	HSPA2	heat shock 70kDa protein 2	BC036107 // P54652 /// BC036107 // B3KUS2	3540136
0.0268632	1.75672	down	AK290401|BC059395|AK297003|AK291518|AK297011|AK131562	EMR1	egf-like module containing, mucin-like, hormone receptor-like 1	NM_001974 // B2R8T0 /// NM_001974 // Q14246 /// AK290401 // A8K2Y6 /// AK290401 // B2R8T0 /// AK290401 // Q14246 /// BC059395 // Q14246 /// BC059395 // B2R8T0 /// AK297003 // B7Z486 /// AK297003 // B2R8T0 /// AK297003 // Q14246 /// AK291518 // A8K653 /// AK291518 // B2R8T0 /// AK291518 // Q14246 /// AK297011 // B7Z489 /// AK297011 // B2R8T0 /// AK297011 // Q14246 /// AK131562 // Q6ZMN0	3818596
0.00161798	1.75521	down	BC067106	GPR176	G protein-coupled receptor 176	BC067106 // Q14439	3619116
0.0384914	1.75468	up	BC051030	SEMA4G	sema domain, immunoglobulin domain (Ig), transmembrane domain (TM) and short cytoplasmic domain, (semaphorin) 4G	NM_017893 // Q9NTN9 /// BC051030 // Q9NTN9	3260895
0.0192963	1.74731	down	U25997	STC1	stanniocalcin 1	NM_003155 // B2R6I6 /// U25997 // P52823 /// U25997 // B2R6I6	3128046
0.0171106	1.74092	down	AF056087	SFRP1	secreted frizzled-related protein 1	NM_003012 // Q05DS5 /// AF056087 // Q8N474 /// AF056087 // Q05DS5	3132782
0.00355081	1.73073	up	AF100759	TSPAN13	tetraspanin 13	NM_014399 // Q6FGK0 /// NM_014399 // B3KQT6 /// AF100759 // O95857 /// AF100759 // Q6FGK0 /// AF100759 // B3KQT6	2991150
0.00176793	1.72174	down	BC037341	GALNTL4	UDP-N-acetyl-alpha-D-galactosamine:polypeptide N-acetylgalactosaminyltransferase-like 4	NM_198516 // B3KNV8 /// NM_198516 // Q58A54 /// BC037341 // Q6P9A2 /// BC037341 // B3KNV8 /// BC037341 // Q58A54	3363091
0.0297264	1.71362	down	AY656715	MCTP1	multiple C2 domains, transmembrane 1	NM_024717 // Q6DN14 /// NM_001002796 // Q6DN14 /// AY656715 // Q6DN14	2867443
0.0147248	1.70354	down	BC140818|BC171800|BC039306	PALM2-AKAP2		NM_007203 // Q9Y2D5 /// NM_147150 // Q9Y2D5 /// NM_053016 // Q8IXS6 /// NM_001037293 // Q8IXS6 /// NM_001136562 // Q9Y2D5 /// NM_001004065 // Q9Y2D5 /// BC140818 // Q9Y2D5 /// BC171800 // Q9Y2D5 /// BC039306 // Q8IXS6	3184408
0.02016	1.70333	down	M97759	ADORA2B	adenosine A2b receptor	NM_000676 // P29275 /// M97759 // P29275	3711869
0.0229673	1.6968	up		NCRNA00173	non-protein coding RNA 173	NR_027345 // Q6ZV60	3433466
0.021165	1.69581	down	BC016648	FOSL1	FOS-like antigen 1	NM_005438 // B2R9B4 /// NM_005438 // Q53GM9 /// NM_005438 // P15407 /// BC016648 // P15407 /// BC016648 // B2R9B4 /// BC016648 // Q53GM9	3377988
0.00508275	1.69564	up	U76368	SLC7A2	solute carrier family 7 (cationic amino acid transporter, y+ system), member 2	NM_001008539 // P52569 /// NM_001164771 // P52569 /// U76368 // P52569	3087659
0.023657	1.69021	down	BC062320	HAPLN3	hyaluronan and proteoglycan link protein 3	NM_178232 // Q96S86 /// BC062320 // Q96S86	3638188
0.0129781	1.68788	down	BC007233	EFHD2	EF-hand domain family, member D2	BC007233 // Q96C19	2321779
0.0406761	1.68446	up	BC008360|BC016154|BC072670	FAM113B	family with sequence similarity 113, member B	BC008360 // Q96HM7 /// BC016154 // Q96HM7	3413067
0.0250725	1.68306	up	BC033890	FOXA1	forkhead box A1	NM_004496 // P55317 /// BC033890 // P55317	3561703
0.0309691	1.68033	down	AF279145	ANTXR1	anthrax toxin receptor 1	NM_032208 // Q9H6X2 /// NM_032208 // Q53FL1 /// NM_018153 // Q96EC6 /// AF279145 // Q9H6X2 /// AF279145 // Q53FL1	2487082
0.0350618	1.67738	up	BC063123	HTR2B	5-hydroxytryptamine (serotonin) receptor 2B	NM_000867 // P41595 /// NM_000867 // Q7Z580 /// BC063123 // P41595 /// BC063123 // Q7Z580	2603395
0.0436299	1.67617	up	AK172746	SCARA5	scavenger receptor class A, member 5 (putative)	AK172746 // Q6ZMJ2	3129175
0.0129781	1.67521	up	AK127432	RASGEF1A	RasGEF domain family, member 1A	AK127432 // B3KXJ1	3286211
0.00395544	1.67457	up	M33011|M32325|BC014785|M32306|M26481|CR542259|CR542283|CR593061|CR626162	EPCAM	epithelial cell adhesion molecule	NM_002354 // P16422 /// M33011 // P16422 /// M32325 // P16422 /// BC014785 // P16422 /// M32306 // P16422 /// M26481 // P16422 /// CR542259 // P16422 /// CR542283 // P16422	2480961
0.029981	1.67243	down	BC140904	PTPRG	protein tyrosine phosphatase, receptor type, G	NM_002841 // P23470 /// NM_002841 // A9QVW2 /// BC140904 // P23470 /// BC140904 // A9QVW2	2626802
0.0140376	1.66832	down	AK300305	MORC4	MORC family CW-type zinc finger 4	NM_024657 // Q8TE76 /// NM_001085354 // Q8TE76 /// AK300305 // B4DTP6 /// AK300305 // Q8TE76	4017212
0.0175323	1.66729	up	AY116661	PLXND1	plexin D1	NM_015103 // Q9Y4D7 /// AY116661 // Q9Y4D7	2694817
0.0281895	1.66646	down	Y10256|AK097219	MAP3K14|LOC100133991	mitogen-activated protein kinase kinase kinase 14 | similar to hCG1995169	Y10256 // Q99558	3759704
0.0129605	1.65981	down	BC049171	FJX1	four jointed box 1 (Drosophila)	NM_014344 // Q86VR8 /// BC049171 // Q86VR8	3326826
0.0130314	1.65512	up	BC036734|BC106871|BC106872|AL136828	SLC41A2	solute carrier family 41, member 2	NM_032148 // Q96JW4 /// BC036734 // Q96JW4 /// BC106871 // Q96JW4 /// BC106872 // Q96JW4 /// AL136828 // Q96JW4	3469180
0.0241647	1.6532	down	AJ250725	ADAMTS12	ADAM metallopeptidase with thrombospondin type 1 motif, 12	AJ250725 // P58397	2852591
0.0232089	1.65222	down	AK290352	EGFR	epidermal growth factor receptor (erythroblastic leukemia viral (v-erb-b) oncogene homolog, avian)	NM_005228 // B6RC65 /// NM_005228 // P00533 /// NM_005228 // Q59FL8 /// NM_005228 // Q68GS6 /// NM_201282 // P00533 /// AK290352 // A8K2T7 /// AK290352 // B6RC65 /// AK290352 // P00533 /// AK290352 // Q59FL8 /// AK290352 // Q68GS6	3002640
0.00176793	1.6489	up	AK289969	PDE4B	phosphodiesterase 4B, cAMP-specific (phosphodiesterase E4 dunce homolog, Drosophila)	NM_002600 // Q68CX5 /// NM_001037341 // Q68CX5 /// NM_001037340 // Q07343 /// NM_001037340 // Q59GM8 /// NM_001037339 // Q13945 /// AK289969 // Q5TEK6 /// AK289969 // Q68CX5	2340529
0.0118902	1.64873	down	BC051338	EPAS1	endothelial PAS domain protein 1	BC051338 // Q99814	2480383
0.0142129	1.64205	up	BX648781	GABARAPL1|GABARAPL3	GABA(A) receptor-associated protein like 1 | GABA(A) receptors associated protein like 3 (pseudogene)	NM_031412 // Q9H0R8 /// NM_031412 // B2RD60	3404636
0.0171106	1.64144	up	AB290166|AY368076|BC136414|AF450487|AK124704|CR749623	KIF21A	kinesin family member 21A	NM_001173464 // Q7Z4S6 /// NM_001173464 // Q2UVF1 /// NM_017641 // Q7Z4S6 /// NM_017641 // Q2UVF1 /// NM_001173463 // Q7Z4S6 /// NM_001173463 // Q2UVF1 /// NM_001173465 // Q7Z4S6 /// NM_001173465 // Q2UVF1 /// AB290166 // Q7Z4S6 /// AB290166 // Q2UVF1 /// AY368076 // Q7Z4S6 /// AY368076 // Q2UVF1 /// BC136414 // B9EGE4 /// BC136414 // Q7Z4S6 /// BC136414 // Q2UVF1 /// AF450487 // Q7Z4S6 /// AF450…	3450775
0.0140773	1.64102	down	BC060868	BMPER	BMP binding endothelial regulator	BC060868 // Q8N8U9	2996563
0.00763563	1.63945	down	AK126105	SUSD2	sushi domain containing 2	NM_019601 // Q9UGT4	3939875
0.0479644	1.63194	up	BC021672	C8orf4	chromosome 8 open reading frame 4	BC021672 // Q9NR00	3095313
0.00959701	1.63007	down	BC004372|AY101192|AL832642|EF581837|AK290424|BC052287|AY101193|BC067348|U40373|FJ216964|M59040|AK297776|M24915|AK304467|AF098641|M25078|AK123567|M83328|U94903	CD44		NM_000610 // P16070 /// NM_000610 // Q99900 /// NM_001001389 // P16070 /// NM_001001389 // Q99900 /// NM_001001390 // P16070 /// NM_001001390 // Q99900 /// NM_001001391 // P16070 /// NM_001001391 // Q99900 /// NM_001001392 // P16070 /// NM_001001392 // Q99900 /// BC004372 // P16070 /// BC004372 // Q99900 /// AY101192 // P16070 /// AY101192 // Q99900 /// AL832642 // P16070 /// AL832642 // Q99900 /…	3326635
0.038135	1.62737	up	BC095477	AMIGO2	adhesion molecule with Ig-like domain 2	NM_181847 // Q86SJ2 /// NM_181847 // B3KS95 /// NM_181847 // B3KRK1 /// BC095477 // Q86SJ2	3452478
0.0196981	1.62689	up	BC023546	LIMCH1	LIM and calponin homology domains 1	NM_014988 // Q9UPQ0 /// NM_014988 // Q6N054 /// NM_001112717 // Q9UPQ0 /// NM_001112717 // Q6N054 /// NM_001112718 // Q9UPQ0 /// NM_001112718 // Q6N054 /// NM_001112719 // Q9UPQ0 /// NM_001112719 // B7Z5G6 /// NM_001112720 // Q9UPQ0 /// NM_001112720 // B7Z5G6 /// BC023546 // Q9UPQ0	2725061
0.00902987	1.62555	down	BC015557	CD68		NM_001251 // P34810 /// NM_001040059 // P34810 /// BC015557 // P34810	3708858
0.0464317	1.62373	down	BC044577	MICAL2	microtubule associated monoxygenase, calponin and LIM domain containing 2	NM_014632 // O94851 /// BC044577 // O94851	3320717
0.0386612	1.62158	down	U23070	BAMBI	BMP and activin membrane-bound inhibitor homolog (Xenopus laevis)	NM_012342 // Q53G66 /// U23070 // Q13145 /// U23070 // Q53G66	3240452
0.0250374	1.62049	up	BC106891	SYNGR4	synaptogyrin 4	NM_012451 // O95473 /// BC106891 // O95473	3837744
0.0366091	1.61474	up	AY113704	APPL2	adaptor protein, phosphotyrosine interaction, PH domain and leucine zipper containing 2	NM_018171 // Q8NEU8 /// NM_018171 // B3KMB9 /// AY113704 // Q8NEU8 /// AY113704 // B3KMB9	3469319
0.010133	1.61092	down	AK299182|AK126871|AK126753	ZNF700|ZNF763|ZNF833	zinc finger protein 700 | zinc finger protein 763 | zinc finger protein 833	NM_144566 // Q9H0M5 /// NM_001012753 // Q0D2J5 /// AK299182 // B4DRB5 /// AK126753 // Q6ZTB9	3821323
0.0279336	1.61064	down	AF256215|AF246960|AF246961|BC125062|AK296706|AF246962|AF231338|BC125061|AF246963|AF231339|AB039921	ARNTL2	aryl hydrocarbon receptor nuclear translocator-like 2	AF256215 // Q8WYA1 /// AF246960 // Q8WYA1 /// AF246961 // Q8WYA1 /// BC125062 // Q8WYA1 /// AK296706 // B7Z429 /// AK296706 // Q8WYA1 /// AF246962 // Q8WYA1 /// AF231338 // Q8WYA1 /// BC125061 // Q8WYA1 /// AF246963 // Q8WYA1 /// AF231339 // Q8WYA1 /// AB039921 // Q8WYA1	3409127
0.0386612	1.60717	up	AB425196	IGF1R	insulin-like growth factor 1 receptor	NM_000875 // P08069 /// AB425196 // P08069	3610958
0.00763563	1.60573	up	AK294423	KCNE4	potassium voltage-gated channel, Isk-related family, member 4	NM_080671 // A5H1P5 /// NM_080671 // Q2N1I0 /// AK294423 // B7Z275	2529627
0.0492112	1.60397	up	BC074806	HOXB2	homeobox B2	NM_002145 // P14652 /// NM_002145 // Q14548 /// BC074806 // P14652 /// BC074806 // Q14548	3761291
0.0144136	1.60381	up	J03580	PTHLH	parathyroid hormone-like hormone	NM_198964 // Q53XY9 /// J03580 // P12272	3448744
0.023657	1.60321	up	BC011447|BC026279|AK291858|CR450324|AK298081|AK055186|AK310162	HLA-DMA|HLA-DMB	major histocompatibility complex, class II, DM alpha | major histocompatibility complex, class II, DM beta	BC011447 // Q31604 /// BC011447 // P28067 /// BC026279 // Q31604 /// BC026279 // P28067 /// AK291858 // Q31604 /// AK291858 // P28067 /// CR450324 // Q6ICR9 /// CR450324 // P28067 /// AK298081 // B7Z4Y5	2950277
0.0128878	1.59955	down	AY445887	SEMA4B	sema domain, immunoglobulin domain (Ig), transmembrane domain (TM) and short cytoplasmic domain, (semaphorin) 4B	NM_020210 // Q9NPR2 /// NM_198925 // Q9NPR2 /// AY445887 // Q9NPR2	3607927
0.00952234	1.59626	down	AF329840	C1QTNF1	C1q and tumor necrosis factor related protein 1	NM_030968 // Q9BXJ1 /// NM_198594 // Q9BXJ1 /// AF329840 // Q9BXJ1	3736636
0.00132165	1.59037	down	BC004929	HSD3B7	hydroxy-delta-5-steroid dehydrogenase, 3 beta- and steroid delta-isomerase 7	NM_001142777 // Q96M28 /// NM_001142778 // Q96M28 /// BC004929 // Q9H2F3	3656737
0.00237076	1.59026	up	AK295380	MEGF9	multiple EGF-like-domains 9	NM_001080497 // Q9H1U4 /// AK295380 // Q9H1U4	3223551
0.0123971	1.58773	down	AK294920	COL4A2	collagen, type IV, alpha 2	NM_001846 // P08572 /// AK294920 // B4DH43 /// AK294920 // P08572	3501219
0.0457486	1.58611	down	AK024854	APOBEC3B	apolipoprotein B mRNA editing enzyme, catalytic polypeptide-like 3B		3945545
0.0450202	1.58501	down	BX647822	FOSL2	FOS-like antigen 2	NM_005253 // B2RD58 /// NM_005253 // B3KP27 /// NM_005253 // P15408 /// BX647822 // P15408	2474977
0.0295887	1.58375	down	M64925	MPP1	membrane protein, palmitoylated 1, 55kDa	NM_002436 // Q5J7V5 /// NM_002436 // Q53F93 /// NM_001166462 // Q5J7V5 /// NM_001166462 // Q53F93 /// NM_001166461 // Q5J7V5 /// NM_001166461 // Q53F93 /// NM_001166460 // Q5J7V5 /// NM_001166460 // Q53F93 /// M64925 // Q00013 /// M64925 // Q5J7V5 /// M64925 // Q53F93	4027585
0.0130314	1.57821	up	BC132676	PLXNA2	plexin A2	NM_025179 // O75051 /// NM_025179 // Q96DQ4 /// BC132676 // O75051 /// BC132676 // Q96DQ4	2453370
0.00741222	1.57613	down	U81234	CXCL6	chemokine (C-X-C motif) ligand 6 (granulocyte chemotactic protein 2)	NM_002993 // P80162 /// NM_002993 // P80162 /// U81234 // P80162	2731350
0.0142129	1.57593	down	AK291652	NID2	nidogen 2 (osteonidogen)	NM_007361 // Q14112 /// AK291652 // Q14112	3564620
0.0258286	1.57429	up	U89326	BMPR1B	bone morphogenetic protein receptor, type IB	U89326 // O00238	2736462
0.0125334	1.57342	up	BC111497	SLAIN1	SLAIN motif family, member 1	NM_001040153 // Q8ND83 /// NM_144595 // Q8ND10 /// BC111497 // Q8ND83	3494706
0.033576	1.57292	down	AB209209	THY1	Thy-1 cell surface antigen	AB209209 // Q59GA0	3394412
0.0196981	1.57088	down	BX649096|AB209361	STAMBPL1|FAS	STAM binding protein-like 1 | Fas (TNF receptor superfamily, member 6)	NM_020799 // Q96FJ0 /// AB209361 // Q59FU8 /// AB209361 // B6VNV5 /// AB209361 // P25445	3257031
0.0192963	1.56912	down	AF074393	RPS6KA5	ribosomal protein S6 kinase, 90kDa, polypeptide 5	AF074393 // O75582	3576284
0.00190177	1.56876	down	BC001174	EXT1	exostosin 1 | exostoses (multiple) 1	NM_000127 // Q16394 /// BC001174 // Q16394	3150060
0.00777125	1.56861	up	BC131555|BC028590	ZNF611|ZNF320|ZNF701	zinc finger protein 611 | zinc finger protein 320 | zinc finger protein 701	NM_001161499 // Q8N823 /// NM_030972 // Q8N823 /// NM_001161500 // Q8N823 /// NM_001161501 // Q8N823 /// NM_207333 // Q6ZP55 /// NM_207333 // A2RRD8 /// BC131555 // A2RRD8 /// BC131555 // Q6ZP55 /// BC028590 // Q8N823	3869714
0.0450202	1.56802	down	AK290708	SECTM1	secreted and transmembrane 1	NM_003004 // Q8WVN6 /// NM_003004 // Q53G27 /// NM_003004 // Q53G63 /// AK290708 // A8K3U3 /// AK290708 // Q8WVN6 /// AK290708 // Q53G27 /// AK290708 // Q53G63	3774906
0.0301797	1.56324	down	M59465	TNFAIP3	tumor necrosis factor, alpha-induced protein 3	NM_006290 // P21580 /// NM_006290 // Q5PY18 /// M59465 // P21580 /// M59465 // Q5PY18	2927506
0.00763563	1.55856	up	AL832686	PDLIM5	PDZ and LIM domain 5	NM_001011515 // Q96HC4 /// NM_001011516 // Q96HC4	2736322
0.038135	1.55835	down	U89942	LOXL2	lysyl oxidase-like 2	NM_002318 // B2R5Q0 /// NM_002318 // Q53HV3 /// U89942 // Q9Y4K0 /// U89942 // B2R5Q0 /// U89942 // Q53HV3	3127818
0.0429569	1.55802	up	BC060798	TMEM117	transmembrane protein 117	NM_032256 // Q9H0C3 /// BC060798 // Q9H0C3	3412345
0.0250374	1.55616	up	U31986	ALX1	ALX homeobox 1	U31986 // Q15699	3424785
0.0328955	1.54192	up	BC016673				3519540
0.00945622	1.54117	down	AF043325|BC006376|BT007024|AK295277|AK302101|BC157831|BC171823|BC005232|AK025065	NMT2|LOC100192204	N-myristoyltransferase 2 | peptidylprolyl isomerase A pseudogene	NM_004808 // B2RCF3 /// NM_004808 // B3KT39 /// AF043325 // O60551 /// AF043325 // B2RCF3 /// AF043325 // B3KT39 /// BC006376 // O60551 /// BC006376 // B2RCF3 /// BC006376 // B3KT39 /// BT007024 // O60551 /// BT007024 // B2RCF3 /// BT007024 // B3KT39 /// AK295277 // B4DHU9 /// AK302101 // B4DXS1 /// BC157831 // B2RXF3 /// BC171823 // B2RXF3 /// BC005232 // Q9BS83	3279108
0.0107104	1.53625	up	BC031265	TSPAN12	tetraspanin 12	NM_012338 // O95859 /// BC031265 // O95859	3069955
0.0467782	1.53603	down	AF016709	P2RX5	purinergic receptor P2X, ligand-gated ion channel, 5	NM_002561 // Q93086 /// NM_002561 // Q0GM92 /// NM_175080 // Q93086 /// NM_175080 // Q0GM92 /// AF016709 // Q93086 /// AF016709 // Q0GM92	3741547
0.038135	1.52976	up	AK056255	BCAT1|DAD1L	branched chain amino-acid transaminase 1, cytosolic | defender against cell death 1-like | branched chain aminotransferase 1, cytosolic	NM_005504 // B3KY27 /// AK056255 // P54687	3447694
0.038135	1.52973	up	AB063116	NAV2	neuron navigator 2	NM_182964 // Q8IVL1 /// NM_145117 // Q8IVL1 /// NM_001111018 // Q8IVL1 /// NM_001111019 // Q8IVL1 /// AB063116 // Q8IVL1	3323052
0.0473554	1.52496	down	U81607	AKAP12	A kinase (PRKA) anchor protein 12	NM_005100 // Q5CZB5 /// NM_005100 // Q02952 /// NM_005100 // Q86TJ9 /// U81607 // Q02952 /// U81607 // Q5CZB5 /// U81607 // Q86TJ9	2931569
0.0142133	1.52381	up	AK123106|BX647258	POC1B|WDR51B|GALNT4	POC1 centriolar protein homolog B (Chlamydomonas) | WD repeat domain 51B | UDP-N-acetyl-alpha-D-galactosamine:polypeptide N-acetylgalactosaminyltransferase 4 (GalNAc-T4)	NM_172240 // Q69YK8 /// NM_172240 // Q8TC44 /// NM_172240 // Q6ZW40	3464912
0.0163635	1.52161	up	BC110452|BC110453|BC126132|BC126134|AK295186|AK316521|AK294926|AF047368|AK022337|AK023957|CR616315	NEBL	nebulette	NM_006393 // O76041 /// NM_213569 // Q70I54 /// NM_213569 // Q8N8M3 /// NM_213569 // Q59FZ8 /// NM_001173484 // Q70I54 /// NM_001173484 // Q8N8M3 /// NM_001173484 // Q59FZ8 /// BC110452 // Q2TBD1 /// BC110452 // O76041 /// BC110453 // O76041 /// BC126132 // Q70I54 /// BC126132 // Q8N8M3 /// BC126132 // Q59FZ8 /// BC126134 // Q70I54 /// BC126134 // Q8N8M3 /// BC126134 // Q59FZ8 /// AK295186 // Q70…	3280573
0.0247169	1.52062	up	BC028374	TTC39A	tetratricopeptide repeat domain 39A	BC028374 // Q5SRH9	2412312
0.0401326	1.51827	down	AK128335	MCAM	melanoma cell adhesion molecule	NM_006500 // B2R642 /// NM_006500 // P43121 /// AK128335 // B3KXZ9	3394264
0.00763563	1.51824	down	BC014527	FBXO27	F-box protein 27	BC014527 // Q8NI29	3861832
0.0225124	1.51651	down	AB020593|AK289375	PDE10A|C6orf176	phosphodiesterase 10A | chromosome 6 open reading frame 176	NM_006661 // Q9Y233 /// NM_001130690 // Q9Y233 /// NR_026860 // A8K010 /// AB020593 // Q9Y233 /// AK289375 // A8K010	2984275
0.0140065	1.51588	down	AK055135|AK124170	TOX2|LOC100128170	TOX high mobility group box family member 2 | hypothetical protein LOC100128170	NM_032883 // Q96NM4 /// NM_001098796 // Q96NM4 /// AK055135 // Q96NM4	3886294
0.0314443	1.51149	down	AF147747|BC057396|DQ232895|AK291209|AK304398|BX648877	SH3BP4	SH3-domain binding protein 4	NM_014521 // Q9P0V3 /// AF147747 // Q9P0V3 /// BC057396 // Q9P0V3 /// DQ232895 // Q9P0V3 /// AK291209 // A8K594 /// AK291209 // Q9P0V3 /// AK304398 // B4E2S1 /// AK304398 // Q9P0V3	2533493
0.00952234	1.51125	up	BC086874	COL5A2	collagen, type V, alpha 2	NM_000393 // P05997 /// BC086874 // Q5PR22	2591643
0.0476111	1.508	down	BC010025	DRAP1	DR1-associated protein 1 (negative cofactor 2 alpha)	NM_006442 // Q14919 /// BC010025 // Q14919	3335736
0.0475388	1.50777	up	AK316509	KLHL13	kelch-like 13 (Drosophila)	NM_001168302 // Q9P2N7 /// NM_033495 // Q9P2N7 /// NM_001168303 // Q9P2N7 /// NM_001168301 // Q9P2N7 /// NM_001168300 // Q9P2N7 /// AK316509 // B7ZB44 /// AK316509 // Q9P2N7	4019160
0.00959701	1.50609	up	U00803	FRK	fyn-related kinase	U00803 // P42685	2970897
0.0159935	1.50069	up	BC033617	TCP11L2	t-complex 11 (mouse)-like 2	NM_152772 // B2RA65 /// BC033617 // Q8N4U5 /// BC033617 // B2RA65	3430086
0.0229673	1.49938	up	AF302150	PLEKHA5	pleckstrin homology domain containing, family A member 5	NM_019012 // Q6NSF8 /// NM_001143821 // Q9HAU0 /// AF302150 // Q9HAU0 /// AF302150 // Q6NSF8	3407096
0.0147248	1.49496	up	AK027572	KCTD6	potassium channel tetramerisation domain containing 6	NM_153331 // Q8NC69 /// AK027572 // Q8NC69	2626258
0.0126544	1.49291	down	U83192	DLG4	discs, large homolog 4 (Drosophila)	NM_001365 // Q3ZCU5 /// NM_001365 // P78352 /// U83192 // P78352 /// U83192 // Q3ZCU5	3743393
0.0308667	1.49104	down	AB031050	SLCO3A1	solute carrier organic anion transporter family, member 3A1	AB031050 // Q9UIG8	3608787
0.0044011	1.49002	down	AB038995	RAB8B		NM_016530 // Q92930 /// NM_016530 // B3KTE3 /// AB038995 // Q92930 /// AB038995 // B3KTE3	3597476
0.00239913	1.48772	down	AK093462	UBE2L6	ubiquitin-conjugating enzyme E2L 6	NM_004223 // O14933 /// NM_198183 // O14933 /// AK093462 // O14933	3373962
0.0241589	1.48637	up	J04027	ATP2B1	ATPase, Ca++ transporting, plasma membrane 1	NM_001001323 // A1X4P7 /// NM_001001323 // P20020 /// NM_001001323 // Q59H63 /// NM_001001323 // Q3L582 /// NM_001682 // A1X4P7 /// NM_001682 // P20020 /// NM_001682 // Q59H63 /// NM_001682 // Q3L582 /// J04027 // P20020 /// J04027 // A1X4P7 /// J04027 // Q59H63 /// J04027 // Q3L582	3464983
0.0318353	1.48267	down	AK291933	STAT3	signal transducer and activator of transcription 3 (acute-phase response factor)	NM_139276 // P40763 /// NM_003150 // P40763 /// NM_213662 // P40763 /// AK291933 // A8K7B8 /// AK291933 // P40763	3757840
0.0286268	1.48222	down	AY358790	CRISPLD2	cysteine-rich secretory protein LCCL domain containing 2	NM_031476 // Q9H0B8 /// AY358790 // Q9H0B8	3671935
0.00902987	1.48024	down	AB081726	CAMK1D|LOC283070	calcium/calmodulin-dependent protein kinase ID | hypothetical LOC283070	AB081726 // Q8IU85	3235516
0.0142129	1.47965	up	BC058835	RASSF6	Ras association (RalGDS/AF-6) domain family member 6	NM_201431 // Q6ZTQ3 /// NM_177532 // Q6ZTQ3 /// BC058835 // Q6ZTQ3	2773222
0.0223836	1.47674	up	AB049758	PBLD	phenazine biosynthesis-like protein domain containing	NM_022129 // B2R5Q8 /// NM_022129 // P30039 /// AB049758 // P30039	3292590
0.00605535	1.47254	up	BC031083	PLS1	plastin 1 | plastin 1 (I isoform)	BC031083 // Q14651	2645906
0.0209226	1.47228	down	BC151220	COL4A1	collagen, type IV, alpha 1	NM_001845 // P02462 /// NM_001845 // A9LSU1 /// NM_001845 // Q59F15 /// BC151220 // P02462 /// BC151220 // A9LSU1 /// BC151220 // Q59F15	3525313
0.0130314	1.46853	up	BC060836	FZD6	frizzled homolog 6 (Drosophila)	NM_001164615 // B2R9H9 /// NM_001164615 // O60353 /// BC060836 // O60353	3110272
0.0209226	1.46337	down	BX647796	ALPK2	alpha-kinase 2	NM_052947 // Q86TB3 /// BX647796 // Q86TB3	3810133
0.0192479	1.46242	up	BX648228	MIA2	melanoma inhibitory activity 2	NM_054024 // Q96PC5 /// BX648228 // B2RA73 /// BX648228 // Q6PIE7	3533485
0.0457874	1.45902	up	AF196185|BC071566|AF467002|AF467003|AF467004|AF467006|AF252293|AF332593|AF196186|AB073671|AF467005|AF332592|AF454059|AF177228|AK098339|AK022265|BX647176|CR618944	PARD3	par-3 partitioning defective 3 homolog (C. elegans)	NM_019619 // Q8IX27 /// NM_019619 // Q8IX28 /// NM_019619 // Q8TEW0 /// AF196185 // Q8TEW0 /// AF196185 // Q8IX27 /// AF196185 // Q8IX28 /// BC071566 // Q6IQ47 /// BC071566 // Q8IX27 /// BC071566 // Q8IX28 /// BC071566 // Q8TEW0 /// AF467002 // Q8TEW0 /// AF467002 // Q8IX27 /// AF467002 // Q8IX28 /// AF467003 // Q8TEW0 /// AF467003 // Q8IX27 /// AF467003 // Q8IX28 /// AF467004 // Q8TEW0 /// AF467…	3284596
0.038135	1.45532	up	DQ020495	LONRF2	LON peptidase N-terminal domain and ring finger 2	NM_198461 // Q1L5Z9 /// NM_198461 // B7ZKY9 /// DQ020495 // Q1L5Z9 /// DQ020495 // B7ZKY9	2567167
0.0241589	1.45492	down	BC150179	C3	complement component 3	BC150179 // P01024	3848039
0.0258927	1.45227	down	DQ010329|AK297517	DTX2|PMS2L11	deltex homolog 2 (Drosophila) | postmeiotic segregation increased 2-like 11 pseudogene	NM_020892 // Q86UW9 /// NM_020892 // Q4FEB2 /// NM_020892 // Q4FEB4 /// NM_001102594 // Q86UW9 /// NM_001102594 // Q4FEB2 /// NM_001102594 // Q4FEB4 /// NM_001102595 // Q86UW9 /// NM_001102595 // Q4FEB2 /// NM_001102595 // Q4FEB4 /// NM_001102596 // Q86UW9 /// NM_001102596 // Q4FEB2 /// NM_001102596 // Q4FEB4 /// DQ010329 // Q4ZH49 /// DQ010329 // Q86UW9 /// DQ010329 // Q4FEB2 /// DQ010329 // Q4F…	3009472
0.0318391	1.44703	up	BC008366|BC000485|M76180|M88700|AK298321|AK298392|BT007009|CR456724|AJ310724	DDC	dopa decarboxylase (aromatic L-amino acid decarboxylase)	BC008366 // P20711 /// BC000485 // P20711 /// M76180 // P20711 /// M88700 // P20711 /// AK298321 // B4DPG2 /// AK298392 // B4DPL5 /// BT007009 // Q53Y41 /// CR456724 // Q6IBS8 /// AJ310724 // Q5W5T9	3050388
0.0399219	1.44367	up	BC051726	GLUL	glutamate-ammonia ligase | glutamate-ammonia ligase (glutamine synthetase)	NM_002065 // P15104 /// NM_002065 // A8YXX4 /// NM_001033044 // P15104 /// NM_001033044 // A8YXX4 /// BC051726 // P15104	2447066
0.0420181	1.44108	up	BC142676	GALNT5	UDP-N-acetyl-alpha-D-galactosamine:polypeptide N-acetylgalactosaminyltransferase 5 (GalNAc-T5)	NM_014568 // Q7Z7M9 /// NM_014568 // Q68VJ5 /// BC142676 // A5PKZ1 /// BC142676 // Q7Z7M9 /// BC142676 // Q68VJ5	2511603
0.0303432	1.4409	down	BC013185|AF073483|BC010512	C11orf68	chromosome 11 open reading frame 68	NM_001135635 // Q9H3H3 /// NM_031450 // Q9H3H3 /// BC013185 // Q9H3H3 /// AF073483 // Q9H3H3 /// BC010512 // Q9H3H3	3378007
0.0250374	1.4383	up	BC010109	CD99		NM_002414 // B2R932 /// NM_002414 // P14209 /// NM_001122898 // B2R932 /// NM_001122898 // P14209 /// BC010109 // P14209 /// BC010109 // B2R932	3966836
0.0378936	1.43773	down	BC132786	DDX58	DEAD (Asp-Glu-Ala-Asp) box polypeptide 58	NM_014314 // O95786 /// NM_014314 // B3KN51 /// BC132786 // O95786 /// BC132786 // B3KN51	3203086
0.0467782	1.43765	down	AF426265|BC130301	C21orf87	chromosome 21 open reading frame 87	AF426265 // P59051 /// BC130301 // P59051	3932261
0.0068531	1.43571	up	BC150263	COBL	cordon-bleu homolog (mouse)	NM_015198 // O75128 /// BC150263 // O75128	3050609
0.0308412	1.43511	up	AK300428	TRIML2	tripartite motif family-like 2	NM_173553 // Q8N7C3 /// AK300428 // B7Z6J6	2797771
0.0399219	1.4312	down	BC101651	CDH4	cadherin 4, type 1, R-cadherin (retinal)	NM_001794 // B2RCN5 /// BC101651 // P55283 /// BC101651 // B2RCN5	3892067
0.00147966	1.42362	down	AF402000	TLN2|MIR190	talin 2 | microRNA 190	NM_015059 // Q9Y4G6 /// AF402000 // Q9Y4G6	3597125
0.0309691	1.42325	down	BC007856|AK127418	MC1R|TUBB3|TUBB4Q|TUBB8|RP11-631M21.2|TUBBP5	melanocortin 1 receptor (alpha melanocyte stimulating hormone receptor) | tubulin, beta 3 | tubulin, beta polypeptide 4, member Q | tubulin, beta 8 | tubulin, beta pseudogene 5	NM_002386 // B3KNP6 /// NM_002386 // Q1JUL4 /// NM_002386 // Q01726 /// NM_006086 // Q53G92 /// BC007856 // Q01726 /// BC007856 // B3KNP6 /// BC007856 // Q1JUL4	3674504
0.00611413	1.42184	down	BC028064	RAB39		NM_017516 // Q14964 /// BC028064 // Q14964	3347533
0.00763563	1.42178	down	BC036495	MMP15	matrix metallopeptidase 15 (membrane-inserted)	NM_002428 // P51511 /// BC036495 // P51511	3663074
0.0068531	1.41996	down	BC021671	ANKRD22	ankyrin repeat domain 22	NM_144590 // Q5VYY1 /// BC021671 // Q5VYY1	3299469
0.0196981	1.41827	down	U35234	PTPRS	protein tyrosine phosphatase, receptor type, S	NM_002850 // Q16343 /// NM_002850 // Q13332 /// NM_002850 // A8E4L7 /// NM_130854 // Q16343 /// NM_130854 // Q13332 /// NM_130854 // A8E4L7 /// NM_130853 // Q16343 /// NM_130853 // Q13332 /// NM_130853 // A8E4L7 /// NM_130855 // Q16343 /// NM_130855 // Q13332 /// NM_130855 // A8E4L7 /// U35234 // Q13332 /// U35234 // Q16343 /// U35234 // A8E4L7	3847112
0.0414328	1.41624	up	U44427|BC002375|AK291866|AK291887|AK291872|AF208012|AK124817|AF004427|U44429|AK090516	TPD52L1	tumor protein D52-like 1	NM_001003395 // Q16890 /// U44427 // Q16890 /// BC002375 // Q16890 /// AK291866 // Q16890 /// AK291887 // Q16890 /// AK291872 // Q16890 /// AF208012 // Q16890 /// AF004427 // Q16890 /// U44429 // Q15730	2924330
0.0181665	1.41147	up	AF329433|BC070374|AK304282|AK301772|AK096114	PON3	paraoxonase 3	NM_000940 // Q15166 /// AF329433 // Q15166 /// BC070374 // Q15166 /// AK304282 // B4E2I0 /// AK301772 // B4DX19	3061964
0.00945622	1.40718	down	AK092741	CRIP1	cysteine-rich protein 1 (intestinal)		3554851
0.033576	1.40699	down	BC026314	SHC3	SHC (Src homology 2 domain containing) transforming protein 3	BC026314 // Q92529	3213847
0.0130314	1.40408	up	AF074264	LRP6	low density lipoprotein receptor-related protein 6	NM_002336 // B3KQG5 /// NM_002336 // B3KQA9 /// NM_002336 // Q59EX8 /// AF074264 // O75581 /// AF074264 // B3KQG5 /// AF074264 // B3KQA9 /// AF074264 // Q59EX8	3444820
0.00945622	1.4027	up	AY338463	MED13L	mediator complex subunit 13-like	NM_015335 // Q71F56 /// AY338463 // Q71F56	3473083
0.0452261	1.40086	down	D11428	PMP22	peripheral myelin protein 22	NM_000304 // Q01453 /// NM_153322 // Q01453 /// D11428 // Q01453	3746574
0.00611413	1.39973	up	AF397170	INADL	InaD-like (Drosophila)	NM_176877 // Q8NI35 /// AF397170 // Q8NI35	2339139
0.0233527	1.39956	down	AK128094	RASA3	RAS p21 protein activator 3		3526831
0.0270049	1.39813	down	BC068080	LRRK1	leucine-rich repeat kinase 1	NM_024652 // Q38SD2 /// NM_024652 // B3KNP5 /// NM_024652 // A6H8V9 /// BC068080 // Q38SD2	3611684
0.0362237	1.39677	up	L13744	MLLT3	myeloid/lymphoid or mixed-lineage leukemia (trithorax homolog, Drosophila); translocated to, 3	NM_004529 // B2R7B3 /// NM_004529 // Q6LEQ8 /// NM_004529 // Q6MZE2 /// L13744 // P42568 /// L13744 // B2R7B3 /// L13744 // Q6LEQ8 /// L13744 // Q6MZE2	3200982
0.0277562	1.39504	down	AF329499	RAB27B		AF329499 // O00194	3788976
0.0412911	1.39219	down	BC108919	RUNX2	runt-related transcription factor 2	NM_004348 // Q13950 /// BC108919 // Q32MY8 /// BC108919 // Q13950	2908762
0.0469043	1.39006	up	BC144513|L77886|BC140775|BC144512|AF533875|AK295028|BC063596|AK021778|AK022139|AK025196|EF139847	PTPRK	protein tyrosine phosphatase, receptor type, K	NM_001135648 // Q68DT8 /// NM_001135648 // Q15262 /// NM_002844 // Q68DT8 /// NM_002844 // Q15262 /// BC144513 // B7ZMG0 /// BC144513 // Q68DT8 /// BC144513 // Q15262 /// L77886 // Q15262 /// L77886 // Q68DT8 /// BC140775 // B2RTQ8 /// BC140775 // Q68DT8 /// BC140775 // Q15262 /// BC144512 // B2RTQ8 /// BC144512 // Q68DT8 /// BC144512 // Q15262 /// AF533875 // Q86WJ2 /// AF533875 // Q68DT8 /// AF…	2973376
0.00575957	1.38877	down	U10886	PTPRJ|OR4B1	protein tyrosine phosphatase, receptor type, J | olfactory receptor, family 4, subfamily B, member 1	U10886 // Q12913	3329983
0.0303095	1.38685	up	M17191	CEACAM5	carcinoembryonic antigen-related cell adhesion molecule 5	NM_004363 // Q68DM9 /// NM_004363 // Q53G30 /// NM_004363 // P06731 /// M17191 // Q13984	3834341
0.0146351	1.3865	up	BC006428	CXXC5	CXXC finger 5	NM_016463 // Q7LFL8 /// BC006428 // Q7LFL8	2831350
0.0467782	1.38345	up	D17427	DSC3	desmocollin 3	NM_024423 // Q9HAX1 /// NM_024423 // Q14574 /// NM_001941 // Q9HAX1 /// NM_001941 // Q14574 /// D17427 // Q14574 /// D17427 // Q9HAX1	3802924
0.0333094	1.3824	up	BC008502|AK130274	C4orf34	chromosome 4 open reading frame 34	BC008502 // Q96QK8	2766492
0.011947	1.3821	up	AF311312	SPAG1	sperm associated antigen 1	AF311312 // Q07617	3109201
0.0111934	1.38206	down	AB072911|BX648809	FXYD5|LOC100127972	FXYD domain containing ion transport regulator 5 | hypothetical LOC100127972	NM_014164 // Q96DB9 /// AB072911 // Q96DB9	3830216
0.0277562	1.38153	down	L40377	SERPINB8	serpin peptidase inhibitor, clade B (ovalbumin), member 8	NM_002640 // B2R9H3 /// NM_002640 // P50452 /// NM_198833 // B2R9H3 /// NM_198833 // P50452 /// L40377 // P50452 /// L40377 // B2R9H3	3791996
0.0142133	1.37931	down	AK294229|AK292984	CHRNA7|CHRFAM7A	cholinergic receptor, nicotinic, alpha 7 | CHRNA7 (cholinergic receptor, nicotinic, alpha 7, exons 5-10) and FAM7A (family with sequence similarity 7A, exons A-E) fusion	NM_000746 // Q5W554 /// NM_000746 // P36544 /// NM_139320 // Q494W8 /// NM_148911 // Q494W8 /// AK294229 // B4DFS0 /// AK292984 // Q494W8	3587226
0.00300327	1.37807	down	BC007660|AB057591|AY358378|AB034203|AF177396|AK295539|AK289897|AB033421|AY587550|AK295441|AF034208|AK090952|AK021538|CR607734	DKK3	dickkopf homolog 3 (Xenopus laevis)	NM_015881 // B3KS70 /// NM_001018057 // B3KS70 /// BC007660 // Q9UBP4 /// BC007660 // B3KS70 /// AB057591 // Q9UBP4 /// AY358378 // Q9UBP4 /// AB034203 // Q9UBP4 /// AB034203 // B3KS70 /// AF177396 // Q9UBP4 /// AF177396 // B3KS70 /// AK295539 // B4DID6 /// AK289897 // Q9UBP4 /// AB033421 // Q9UBP4 /// AB033421 // B3KS70 /// AY587550 // Q6PQ81 /// AY587550 // B3KS70 /// AK295441 // B4DI69 /// AK2…	3363266
0.0158555	1.3775	down	AB044385|BC041842	THSD1P1|TPTE2P3|TPTE2P2	thrombospondin, type I, domain containing 1 pseudogene 1 | transmembrane phosphoinositide 3-phosphatase and tensin homolog 2 pseudogene 3 | transmembrane phosphoinositide 3-phosphatase and tensin homolog 2 pseudogene 2	NM_018676 // Q9NS62 /// NM_018676 // B3KTY7 /// NM_199263 // Q9NS62 /// NM_199263 // B3KTY7 /// AB044385 // Q9NS62 /// AB044385 // B3KTY7	3514879
0.0301835	1.37705	up	AK055718	GULP1	GULP, engulfment adaptor PTB domain containing 1	AK055718 // Q9UBP9	2519480
0.0297264	1.37466	down	AK090860	PREX1	phosphatidylinositol-3,4,5-trisphosphate-dependent Rac exchange factor 1	NM_020820 // Q8TCU6	3908631
0.0362502	1.37123	down	AK024533	AVPI1	arginine vasopressin-induced 1	NM_021732 // Q5T686 /// NM_021732 // Q6ZP29	3302495
0.00757043	1.37005	down	BX537897	MAPK3	mitogen-activated protein kinase 3	NM_001040056 // P27361 /// NM_002746 // P27361 /// NM_001109891 // P27361 /// BX537897 // Q7Z3H5 /// BX537897 // B3KR49 /// BX537897 // Q9BWJ1	3687494
0.0126544	1.36879	down	BC141859	PBX4	pre-B-cell leukemia homeobox 4	NM_025245 // Q9BYU1 /// BC141859 // Q9BYU1	3855818
0.00902987	1.36716	up	AF199023	PLSCR4	phospholipid scramblase 4	NR_033438 // Q9NRQ2 /// NR_033438 // B2R720 /// NR_033438 // Q6ZR73 /// NM_020353 // Q9NRQ2 /// NM_020353 // B2R720 /// NM_020353 // Q6ZR73 /// NM_001128306 // Q9NRQ2 /// NM_001128306 // B2R720 /// NM_001128306 // Q6ZR73 /// NM_001177304 // Q9NRQ2 /// NM_001177304 // B2R720 /// NM_001177304 // Q6ZR73 /// AF199023 // Q9NRQ2 /// AF199023 // B2R720 /// AF199023 // Q6ZR73	2699623
0.0130314	1.36658	down	BC126118	AMPD3	adenosine monophosphate deaminase 3 | adenosine monophosphate deaminase (isoform E)	NM_001025390 // Q01432 /// NM_000480 // Q01432 /// BC126118 // A0AUX0 /// BC126118 // Q01432	3320169
0.0282267	1.36427	up	AF080394	TRPC6	transient receptor potential cation channel, subfamily C, member 6	NM_004621 // B3KNL3 /// NM_004621 // Q9Y210 /// AF080394 // Q9Y210 /// AF080394 // B3KNL3	3388438
0.0342873	1.36261	up	BC005010	ZFP36L2	zinc finger protein 36, C3H type-like 2	NM_006887 // P47974 /// BC005010 // P47974	2550522
0.0301797	1.36069	up	D76444|BC035053|BC110333|AK294389|AK122978|BC022477	RNF103|VPS24	ring finger protein 103 | vacuolar protein sorting 24 homolog (S. cerevisiae)	NM_005667 // B2RAG4 /// D76444 // O00237 /// D76444 // B2RAG4 /// BC035053 // O00237 /// BC035053 // B2RAG4 /// BC110333 // O00237 /// BC110333 // B2RAG4 /// AK294389 // B4DG34	2562867
0.0419011	1.36059	up	AF272390|AF007131	MYO5C|LOC100129973	myosin VC | hypothetical protein LOC100129973	NM_018728 // Q9P0E7 /// NM_018728 // Q14783 /// AF272390 // Q9NQX4 /// AF272390 // Q9P0E7 /// AF272390 // Q14783	3624513
0.0130314	1.36011	down	BC152448|AK290231	LPIN2|CHORDC1|LOC727896	lipin 2 | cysteine and histidine-rich domain (CHORD)-containing 1 | cysteine and histidine-rich domain (CHORD)-containing 1 pseudogene	NM_014646 // Q92539 /// BC152448 // Q92539 /// AK290231 // Q9UHD1	3796335
0.0342873	1.35795	up	AK294517|BC032784|AF071569|AY987011|AB209288|BC022558|BX647363|AK130928	CAMK2D	calcium/calmodulin-dependent protein kinase II delta	NM_001221 // A8MVS8 /// NM_001221 // Q13557 /// NM_172127 // A8MVS8 /// NM_172127 // Q13557 /// NM_172128 // A8MVS8 /// NM_172128 // Q13557 /// AK294517 // B7Z2B0 /// BC032784 // Q13557 /// AF071569 // Q13557 /// AF071569 // A8MVS8 /// AY987011 // Q13557 /// AY987011 // A8MVS8 /// AB209288 // Q13557 /// AB209288 // Q92991 /// BC022558 // Q4G1A8 /// AK130928 // Q6ZNN9	2782545
0.0202327	1.35422	up	AB208789	SCP2	sterol carrier protein 2	NM_001007098 // B2R761 /// NM_001007098 // P22307 /// AB208789 // Q59HG9 /// AB208789 // B2R761 /// AB208789 // P22307	2336585
0.0224385	1.35325	down	AK295863	SYNGR1	synaptogyrin 1	NM_004711 // O43759 /// NM_145731 // O43759 /// NM_145738 // O43759 /// AK295863 // B5MCD7	3945781
0.0272387	1.35235	down	AY101176|AY358461|BC110539|BC020962|AB033073|BC090952|AK126452|AK308829	SULF2	sulfatase 2	NM_018837 // Q8IWU5 /// NM_018837 // Q6DKK3 /// NM_198596 // Q8IWU5 /// NM_001161841 // Q8IWU5 /// AY101176 // Q8IWU5 /// AY358461 // Q8IWU5 /// BC110539 // Q8IWU5 /// BC110539 // Q6DKK3 /// BC020962 // Q8IWU5 /// BC020962 // Q6DKK3 /// AB033073 // Q8IWU5 /// AB033073 // Q6DKK3 /// BC090952 // Q5BKT1	3908358
0.0309528	1.3516	up	D78152	ANXA4	annexin A4	NM_001153 // Q6LES2 /// D78152 // P09525 /// D78152 // Q6LES2	2487412
0.0294601	1.34879	down	BC041095	SLCO2B1	solute carrier organic anion transporter family, member 2B1	NM_007256 // O94956 /// NM_007256 // C7BWB7 /// NM_001145211 // O94956 /// NM_001145211 // C7BWB7 /// NM_001145212 // O94956 /// NM_001145212 // C7BWB7 /// BC041095 // O94956 /// BC041095 // C7BWB7	3340449
0.0499067	1.34857	down	BC009381	STMN3	stathmin-like 3	NM_015894 // Q8NCA8 /// BC009381 // Q9NZ72	3914050
0.00161798	1.3466	down	BC007538	CEBPB	CCAAT/enhancer binding protein (C/EBP), beta	NM_005194 // P17676 /// NM_005194 // Q9BSC0 /// BC007538 // P17676 /// BC007538 // Q9BSC0	3888613
0.0461602	1.34426	down	AF071218	BAG3	BCL2-associated athanogene 3	NM_004281 // Q53GY1 /// AF071218 // O95817 /// AF071218 // Q53GY1	3267314
0.00378264	1.34412	down	BC016041	IGFBP4	insulin-like growth factor binding protein 4	NM_001552 // P22692 /// BC016041 // P22692	3721010
0.0267182	1.34386	down	AF288741|AF323731|BC118914|AK294007|AK296525|AK300323|AK296354|AK131374|AK093196|AK097581|BC018025	OSBP2	oxysterol binding protein 2	NM_030758 // Q969R2 /// AF288741 // Q969R2 /// AF323731 // Q969R2 /// BC118914 // Q0VF99 /// BC118914 // Q969R2 /// AK294007 // B4DFA8 /// AK296525 // B4DKE4 /// AK300323 // B4DTR3 /// AK296354 // B4DK24 /// AK131374 // Q6ZN50 /// AK093196 // Q8NA37	3942531
0.0209226	1.34373	up	AK291002	ZNF738	zinc finger protein 738	NR_027130 // B3KNJ0 /// NR_027130 // Q8NE65 /// AK291002 // Q8NE65 /// AK291002 // B3KNJ0	3826542
0.0302268	1.34142	up	AK292980	SCYL2	SCY1-like 2 (S. cerevisiae)	AK292980 // Q6P3W7	3428131
0.0439851	1.34075	down	AK122975	TGFB1I1	transforming growth factor beta 1 induced transcript 1	NM_001042454 // O43294 /// NM_015927 // O43294 /// NM_001164719 // O43294 /// AK122975 // O43294	3657193
0.0239124	1.34021	down	BC002532	NPC2|TMEM90A	Niemann-Pick disease, type C2 | transmembrane protein 90A	NM_006432 // B2R4S5 /// NM_006432 // Q53HV6 /// NM_006432 // P61916 /// BC002532 // P61916 /// BC002532 // B2R4S5 /// BC002532 // Q53HV6	3571904
0.00611413	1.33785	up	AK291415|AK093508	PBX1|LOC100131938	pre-B-cell leukemia homeobox 1 | hypothetical LOC100131938	AK291415 // A8K5V0	2364677
0.00353397	1.33522	down	AF023476	ADAM12	ADAM metallopeptidase domain 12	AF023476 // O43184	3311832
0.00915959	1.33478	down	BC013740|AK294974|AK096630|AB209108	SLC2A6	solute carrier family 2 (facilitated glucose transporter), member 6	NM_017585 // Q9UGQ3 /// NM_017585 // Q8NCC2 /// NM_001145099 // Q9UGQ3 /// NM_001145099 // Q8NCC2 /// BC013740 // Q9UGQ3 /// BC013740 // Q8NCC2 /// AK294974 // B4DH85 /// AK096630 // Q9UGQ3 /// AB209108 // Q59GK1	3228727
0.0270049	1.33467	up	DQ278868	TCTN1	tectonic family member 1	NM_001173975 // Q2MV58 /// NM_024549 // Q2MV58 /// NM_001173976 // Q2MV58 /// DQ278868 // Q2MV58	3431620
0.0258286	1.33444	up	BC007202	MEIS2	Meis homeobox 2	NM_172316 // B3KPQ6 /// NM_170677 // B3KPD8 /// NM_170677 // B3KP81 /// NM_170677 // O14770 /// NM_170674 // B3KPD8 /// NM_170674 // B3KP81 /// NM_170674 // O14770 /// NM_172315 // B3KP98 /// NM_170675 // B3KPD8 /// NM_170675 // B3KP81 /// NM_170675 // O14770 /// NM_170676 // B3KPD8 /// NM_170676 // B3KP81 /// NM_170676 // O14770 /// BC007202 // Q96DI2	3618333
0.0241647	1.33313	up	BC042458|BC001136|AF286160|AB209407|AK057463|AK095775|CR595156|BX647627	PLEKHA1	pleckstrin homology domain containing, family A (phosphoinositide binding specific) member 1	NM_001001974 // B2RBH1 /// NM_001001974 // B3KQL5 /// NM_021622 // B2RBH1 /// NM_021622 // B3KQL5 /// BC042458 // Q9HB21 /// BC001136 // Q9HB21 /// BC001136 // B2RBH1 /// BC001136 // B3KQL5 /// AF286160 // Q9HB21 /// AB209407 // Q59FQ3 /// AK057463 // B3KQ55	3268274
0.038135	1.33227	up		FZD5	frizzled homolog 5 (Drosophila)	NM_003468 // Q9H0C6 /// NM_003468 // B2RCZ1	2596763
0.02948	1.33047	up	M77830	DSP	desmoplakin	NM_004415 // B4DWT7 /// NM_004415 // B4DKX6 /// NM_004415 // P15924 /// NM_004415 // Q4LE79 /// NM_001008844 // B4DWT7 /// NM_001008844 // B4DKX6 /// NM_001008844 // P15924 /// NM_001008844 // Q4LE79 /// M77830 // P15924 /// M77830 // B4DWT7 /// M77830 // B4DKX6 /// M77830 // Q4LE79	2893794
0.0247169	1.33046	up	BC060873	FAM174B	family with sequence similarity 174, member B	NM_207446 // Q3ZCQ3 /// BC060873 // Q3ZCQ3	3639406
0.00999021	1.32936	up	BX538169	TMTC3	transmembrane and tetratricopeptide repeat containing 3	NM_181783 // Q6ZXV5 /// BX538169 // Q6ZXV5	3425134
0.0090099	1.32845	up	BC126155	C2orf67	chromosome 2 open reading frame 67	NM_152519 // A0AUZ9 /// BC126155 // A0AUZ9	2597273
0.0439599	1.32581	up	BC023542	SORT1	sortilin 1	BC023542 // Q99523	2427007
0.033576	1.32547	up	BC039859	TMCC1	transmembrane and coiled-coil domain family 1	NM_001017395 // O94876 /// NM_001017395 // Q6N039 /// NM_001128224 // O94876 /// NM_001128224 // Q6N039 /// NR_033361 // Q6N039 /// BC039859 // O94876 /// BC039859 // Q6N039	2694931
0.00812361	1.32502	down	AK026256	GDPD3	glycerophosphodiester phosphodiesterase domain containing 3	AK026256 // Q7L5L3	3687475
0.0159935	1.32252	up	BC000039	CALHM2	calcium homeostasis modulator 2	NM_015916 // Q9HA72 /// NR_024552 // Q9HA72 /// BC000039 // Q9HA72	3304767
0.0296595	1.32181	up	AB208933	RPS6KA3	ribosomal protein S6 kinase, 90kDa, polypeptide 3	NM_004586 // P51812 /// AB208933 // P51812	4002173
0.0313665	1.31211	up	AB024494	ZDHHC17	zinc finger, DHHC-type containing 17	NM_015336 // Q8IUH5 /// AB024494 // Q8IUH5	3423184
0.0439851	1.31194	up	AF099505	VGLL3	vestigial like 3 (Drosophila)	AF099505 // Q9UKZ7	2684851
0.0399219	1.31112	up	BC007849|AF088003	C12orf62	chromosome 12 open reading frame 62	BC007849 // Q96I36	3414440
0.00902987	1.31085	down	L36463	RIN1	Ras and Rab interactor 1	L36463 // Q13671	3378191
0.0295887	1.31031	up	DQ682656	MARVELD2	MARVEL domain containing 2	DQ682656 // Q8N4S9	2813567
0.0198488	1.30998	down	BC051323|BC026895	ZNF488	zinc finger protein 488	NM_153034 // Q96MN9 /// BC051323 // Q96MN9 /// BC026895 // Q05CE0 /// BC026895 // Q96MN9	3245483
0.0196981	1.30946	up	BC060875|AK096792	TMEM144|LOC285505	transmembrane protein 144 | hypothetical protein LOC285505	BC060875 // Q7Z5S9	2749380
0.0142133	1.30708	down	BC065509	COL6A2	collagen, type VI, alpha 2	NM_001849 // P12110 /// BC065509 // P12110	3924424
0.010133	1.30541	down	BC114569	TMEM132A	transmembrane protein 132A	NM_017870 // Q24JP5 /// NM_178031 // Q24JP5 /// BC114569 // Q24JP5	3332626
0.0126544	1.30414	up	BC093088	LRRIQ1	leucine-rich repeats and IQ motif containing 1	NM_001079910 // Q96JM4 /// NM_032165 // Q96JM4 /// BC093088 // Q96JM4	3424705
0.038135	1.30403	up	BC022026	ATE1	arginyltransferase 1	NM_001001976 // O95260 /// NM_007041 // B2R7P0 /// NM_007041 // O95260 /// BC022026 // O95260 /// BC022026 // B2R7P0	3310413
0.0481357	1.30231	down	AB032992	ZC4H2	zinc finger, C4H2 domain containing	NM_001178032 // Q9NQZ6 /// AB032992 // Q9NQZ6 /// AB032992 // Q53H73	4010768
0.00999021	1.30216	down	BC002851	PCSK1N	proprotein convertase subtilisin/kexin type 1 inhibitor	BC002851 // Q9UHG2	4007550
0.0175323	1.3008	down	AF153416	EPB41L4B	erythrocyte membrane protein band 4.1 like 4B	NM_019114 // Q9NSG9 /// NM_019114 // Q59GC2 /// AF153416 // Q9H329 /// AF153416 // Q9NSG9 /// AF153416 // Q59GC2	3219788
0.0411331	1.29807	down	BC109033	PRKCE	protein kinase C, epsilon	NM_005400 // B2R9M7 /// NM_005400 // Q02156 /// BC109033 // Q02156 /// BC109033 // B2R9M7	2480168
0.0419011	1.29784	down	X02812	TGFB1	transforming growth factor, beta 1	NM_000660 // P01137 /// NM_000660 // Q5PY19 /// X02812 // P01137 /// X02812 // Q5PY19	3863021
0.0197418	1.29706	down	BC063016	FAM176A	family with sequence similarity 176, member A	NM_001135032 // Q9H8M9 /// NM_032181 // Q9H8M9 /// BC063016 // Q9H8M9	2560625
0.0203263	1.29659	up	BC146764	MYO6	myosin VI	NM_004999 // Q9UM54 /// NM_004999 // Q14784 /// BC146764 // Q9UM54 /// BC146764 // Q14784	2914070
0.0218941	1.29457	up	BC117209	CLIP1	CAP-GLY domain containing linker protein 1	NM_002956 // Q6Q318 /// NM_002956 // Q6P5Z9 /// NM_002956 // B3KXA5 /// NM_002956 // P30622 /// NM_002956 // Q59GJ4 /// NM_198240 // Q6Q318 /// NM_198240 // Q6P5Z9 /// NM_198240 // B3KXA5 /// NM_198240 // P30622 /// NM_198240 // Q59GJ4 /// BC117209 // P30622 /// BC117209 // Q6Q318 /// BC117209 // Q6P5Z9 /// BC117209 // B3KXA5 /// BC117209 // Q59GJ4	3475587
0.0318391	1.29371	down	BC014087	SYNGR3	synaptogyrin 3	NM_004209 // O43761 /// BC014087 // O43761	3644309
0.0209226	1.29263	up	AF213259	MAGI3	membrane associated guanylate kinase, WW and PDZ domain containing 3	NM_152900 // Q5TCQ9 /// NM_001142782 // Q5TCQ9 /// AF213259 // Q5TCQ9	2352609
0.0202567	1.29229	down	BC028013	RELB	v-rel reticuloendotheliosis viral oncogene homolog B	BC028013 // Q01201	3835966
0.0163635	1.2916	down	BC013740|AK294974|AB209108|AK096630	SLC2A6	solute carrier family 2 (facilitated glucose transporter), member 6	NM_017585 // Q9UGQ3 /// NM_017585 // Q8NCC2 /// NM_001145099 // Q9UGQ3 /// NM_001145099 // Q8NCC2 /// BC013740 // Q9UGQ3 /// BC013740 // Q8NCC2 /// AK294974 // B4DH85 /// AB209108 // Q59GK1 /// AK096630 // Q9UGQ3	4052021
0.0367143	1.28976	down	U59464	PTCH1	patched homolog 1 (Drosophila)	NM_001083602 // A3KBI9 /// NM_001083602 // Q5R1U9 /// NM_001083602 // Q5R1V0 /// NM_001083603 // A3KBI9 /// NM_001083603 // Q5R1U9 /// NM_001083603 // Q5R1V0 /// NM_001083606 // A3KBI9 /// NM_001083606 // Q5R1U9 /// NM_001083606 // Q5R1V0 /// NM_001083605 // A3KBI9 /// NM_001083605 // Q5R1U9 /// NM_001083605 // Q5R1V0 /// NM_001083604 // A3KBI9 /// NM_001083604 // Q5R1U9 /// NM_001083604 // Q5R1V…	4051849
0.0255424	1.28836	down	BC050743	SMAD3	SMAD family member 3	NM_005902 // Q6I9W9 /// NM_005902 // Q9P0T0 /// NM_005902 // Q59F45 /// NM_001145103 // Q6I9W9 /// NM_001145103 // Q9P0T0 /// NM_001145103 // Q59F45 /// NM_001145104 // Q6I9W9 /// NM_001145104 // Q9P0T0 /// NM_001145104 // Q59F45 /// BC050743 // P84022 /// BC050743 // Q6I9W9 /// BC050743 // Q9P0T0 /// BC050743 // Q59F45	3598959
0.039847	1.2881	down	AF126781	HSD17B14	hydroxysteroid (17-beta) dehydrogenase 14	AF126781 // Q9BPX1	3867443
0.0121468	1.28579	down	BC026030	ZNF239	zinc finger protein 239	NM_005674 // Q16600 /// BC026030 // Q16600	3286343
0.0298204	1.28514	up	BC127107	MGAT4A	mannosyl (alpha-1,3-)-glycoprotein beta-1,4-N-acetylglucosaminyltransferase, isozyme A	BC127107 // Q9UM21	2566414
0.0203263	1.28304	down	AF174487	BOK|BOKAS	BCL2-related ovarian killer | BOK antisense RNA (non-protein coding)	NM_032515 // Q9UMX3 /// AF174487 // Q9UMX3	2536625
0.0294601	1.28222	down	BC064577	CPNE7	copine VII	NM_014427 // Q9UBL6 /// NM_153636 // Q9UBL6 /// BC064577 // Q9UBL6	3674199
0.0259621	1.28061	up	AF098642	PLSCR1	phospholipid scramblase 1	NM_021105 // O15162 /// AF098642 // O15162	2699726
0.0197843	1.28033	down	AF494534	PLEKHO2	pleckstrin homology domain containing, family O member 2	NM_025201 // Q8TD55 /// NM_025201 // Q9HBR5 /// NM_025201 // B3KTW8 /// AF494534 // Q8TD55 /// AF494534 // Q9HBR5 /// AF494534 // B3KTW8	3598165
0.0192229	1.27846	down	U17327	NOS1	nitric oxide synthase 1 (neuronal)	U17327 // P29475	3473524
0.0258286	1.27668	down	BC065195	PNPLA3	patatin-like phospholipase domain containing 3	NM_025225 // Q9NST1 /// BC065195 // Q9NST1	3947952
0.010133	1.27609	down	AB037187	CHST7	carbohydrate (N-acetylglucosamine 6-O) sulfotransferase 7	AB037187 // Q9NS84	3975815
0.00375085	1.27473	up	BC003672	FABP4	fatty acid binding protein 4, adipocyte	BC003672 // P15090	3142381
0.00696947	1.27354	down	BC146868	COL12A1	collagen, type XII, alpha 1	NM_004370 // Q99715 /// NM_080645 // Q99715 /// BC146868 // B9EJB8 /// BC146868 // Q99715	2961177
0.0202327	1.27101	up	BC136302	ATF7	activating transcription factor 7	NM_006856 // B2R8U0 /// NM_006856 // P17544 /// NM_001130059 // B2R8U0 /// NM_001130059 // P17544 /// NM_001130060 // B2R8U0 /// NM_001130060 // P17544 /// BC136302 // B2RMP1 /// BC136302 // B2R8U0 /// BC136302 // P17544	3456260
0.038135	1.2694	up	BC049369	PTPLB	protein tyrosine phosphatase-like (proline instead of catalytic arginine), member b	BC049369 // Q6Y1H2	2692411
0.0167188	1.26845	down	BC020565|DQ658848|BX647316|BC030559|AK308661|AK311241	SLC22A17	solute carrier family 22, member 17	NM_016609 // Q8WUG5 /// NM_016609 // Q5BKY8 /// NM_020372 // Q2TAB0 /// BC020565 // Q8WUG5 /// BC020565 // Q2TAB0 /// DQ658848 // A4UA13 /// DQ658848 // Q8WUG5 /// DQ658848 // Q5BKY8	3557350
0.0399219	1.26664	down	BC010536|AL049332	CXADR|BTG3	coxsackie virus and adenovirus receptor | BTG family, member 3	NM_001338 // P78310 /// BC010536 // P78310	3915479
0.0140376	1.26611	down	BC151244	FRMD4A	FERM domain containing 4A	NM_018027 // Q9P2Q2 /// BC151244 // Q9P2Q2	3278401
0.0197272	1.26587	up	J02984	RPS15	ribosomal protein S15	J02984 // P62841	2586798
0.0350618	1.2655	down	BC027999|BC047238|AK098755	C1orf51	chromosome 1 open reading frame 51	BC027999 // Q8N365 /// BC027999 // Q8WVX4 /// BC047238 // Q8N365 /// AK098755 // Q8N365	2358136
0.0399219	1.26257	down	AK093427	SIGIRR	single immunoglobulin and toll-interleukin 1 receptor (TIR) domain		3357885
0.0196981	1.25539	up	AF376803|BC113525	NLGN4X|NLGN4Y	neuroligin 4, X-linked | neuroligin 4, Y-linked	NM_020742 // Q8N0W4 /// NM_020742 // B3KMT6 /// NM_181332 // Q8N0W4 /// NM_181332 // B3KMT6 /// AF376803 // Q8N0W4 /// AF376803 // B3KMT6 /// BC113525 // Q8NFZ3 /// BC113525 // Q8N0W4 /// BC113525 // B3KMT6	3998247
0.0142133	1.25505	down	BC006122	MMACHC	methylmalonic aciduria (cobalamin deficiency) cblC type, with homocystinuria	NM_015506 // Q9Y4U1 /// BC006122 // Q9Y4U1	2334350
0.0130314	1.25481	down	BC050450	BCAM	basal cell adhesion molecule (Lutheran blood group)	NM_005581 // P50895 /// NM_001013257 // P50895 /// BC050450 // P50895	3835777
0.0499645	1.25342	up	AB021179	HEXIM1	hexamethylene bis-acetamide inducible 1	NM_006460 // O94992 /// AB021179 // O94992	3723348
0.0142133	1.25229	up	BC151842|AK095925	PTPRM|LOC100128219	protein tyrosine phosphatase, receptor type, M | hypothetical protein LOC100128219	NM_001105244 // P28827 /// NM_002845 // P28827 /// BC151842 // A7MBN1	3777470
0.0194743	1.25212	down	AF029778	JAG2	jagged 2	NM_002226 // Q9Y219 /// NM_145159 // Q9Y219 /// AF029778 // Q9Y219	3581442
0.0439851	1.25183	up	BC063876|BC000993|AB053316|BC093902|BC112235|AK092310|AK055978	ICA1L	islet cell autoantigen 1,69kDa-like	NM_138468 // Q8NDH6 /// BC063876 // Q8NDH6 /// BC000993 // Q8NDH6 /// AB053316 // Q96Q33 /// BC093902 // Q96Q33 /// BC112235 // Q96Q33 /// AK092310 // Q8NDH6 /// AK055978 // Q8NDH6	2595388
0.021165	1.25076	down	AK292984|U40583	CHRFAM7A|CHRNA7	CHRNA7 (cholinergic receptor, nicotinic, alpha 7, exons 5-10) and FAM7A (family with sequence similarity 7A, exons A-E) fusion | cholinergic receptor, nicotinic, alpha 7	NM_139320 // Q494W8 /// NM_148911 // Q494W8 /// NM_000746 // Q5W554 /// NM_000746 // P36544 /// AK292984 // Q494W8 /// U40583 // P36544 /// U40583 // Q5W554	3615791
0.026016	1.24979	down	BC064363	BARX1	BARX homeobox 1	BC064363 // Q9HBU1	3215395
0.0411828	1.24965	up	BC042421|BT007196	GK|LOC652904	glycerol kinase | CDC28 protein kinase regulatory subunit 1B pseudogene	NM_001128127 // P32189 /// NM_001128127 // Q14409 /// NM_203391 // P32189 /// NM_203391 // Q14409 /// NM_000167 // P32189 /// NM_000167 // Q14409 /// NM_000167 // P32189 /// NM_000167 // Q14409 /// NM_000167 // P32189 /// NM_000167 // Q14409 /// BC042421 // P32189 /// BC042421 // Q14409 /// BC042421 // P32189 /// BC042421 // Q14409	3972929
0.0192216	1.24633	down	AY358404	SEZ6L2	seizure related 6 homolog (mouse)-like 2	NM_012410 // Q8NC33 /// NM_012410 // B3KNK2 /// NM_012410 // B3KNF3 /// NM_012410 // Q6UXD5 /// NM_201575 // Q8NC33 /// NM_201575 // B3KNK2 /// NM_201575 // B3KNF3 /// NM_201575 // Q6UXD5 /// NM_001114099 // Q8NC33 /// NM_001114099 // B3KNK2 /// NM_001114099 // B3KNF3 /// NM_001114099 // Q6UXD5 /// NM_001114100 // Q8NC33 /// NM_001114100 // B3KNK2 /// NM_001114100 // B3KNF3 /// NM_001114100 // Q6…	3687277
0.00763563	1.24585	down	BC041130	FCHO1	FCH domain only 1	NM_001161357 // O14526 /// NM_001161358 // O14526 /// BC041130 // O14526	3824540
0.0472579	1.24424	up	DQ023508|DQ023510|BC064381|BC012002|AK291214|DQ023509|AF136972|AF294792|DQ023511|AK057711	PPM1B	protein phosphatase, Mg2+/Mn2+ dependent, 1B | protein phosphatase 1B (formerly 2C), magnesium-dependent, beta isoform	NM_177968 // O75688 /// NM_001033557 // Q658R4 /// NM_001033557 // B3KP90 /// NM_001033557 // O75688 /// NM_002706 // Q658R4 /// NM_002706 // B3KP90 /// NM_002706 // O75688 /// NM_177969 // Q658R4 /// NM_177969 // B3KP90 /// NM_177969 // O75688 /// DQ023508 // O75688 /// DQ023510 // Q4J6C1 /// DQ023510 // Q658R4 /// DQ023510 // B3KP90 /// DQ023510 // O75688 /// BC064381 // O75688 /// BC012002 // …	2479640
0.0101039	1.24372	up	D00408|BC069418	CYP3A7|CYP3A4	cytochrome P450, family 3, subfamily A, polypeptide 7 | cytochrome P450, family 3, subfamily A, polypeptide 4	NM_017460 // P08684 /// D00408 // P24462 /// BC069418 // Q6GRK0 /// BC069418 // P08684	3063463
0.019605	1.24253	up	EU251076	KCNT2	potassium channel, subfamily T, member 2	NM_198503 // Q6ZS12 /// NM_198503 // Q6UVM3 /// EU251076 // A9LNM6 /// EU251076 // Q6ZS12 /// EU251076 // Q6UVM3	2449391
0.00132165	1.24015	down	AB026831	PADI3	peptidyl arginine deiminase, type III	AB026831 // Q9ULW8	2322818
0.0109128	1.23797	up	AK094654	C14orf129	chromosome 14 open reading frame 129	NM_016472 // Q9P0R6 /// AK094654 // Q9P0R6	3550328
0.00952234	1.23738	up	BC071585	RBM47	RNA binding motif protein 47	NM_001098634 // A0AV96 /// NM_019027 // A0AV96	2766788
0.0202567	1.23648	down	BC057815	RRAD	Ras-related associated with diabetes	BC057815 // P55042	3695343
0.0308412	1.2351	down	BC036053|BC006435	CCDC146|POLR2J4	coiled-coil domain containing 146 | polymerase (RNA) II (DNA directed) polypeptide J4, pseudogene	NM_020879 // Q96MS1 /// BC036053 // Q8IYE0 /// BC036053 // Q96MS1	3009838
0.0479644	1.23337	up	BC093046	SPPL2B	signal peptide peptidase-like 2B	NM_001077238 // Q8TCT7 /// NM_152988 // Q8TCT7 /// BC093046 // Q8TCT7	3816424
0.0433839	1.23331	up	U28389	EPB49	erythrocyte membrane protein band 4.9 (dematin)	NM_001978 // Q08495 /// NM_001978 // Q59EU3 /// NM_001114138 // Q08495 /// NM_001114138 // Q59EU3 /// NM_001114139 // B3KRH3 /// U28389 // Q08495 /// U28389 // Q59EU3	3089102
0.0318391	1.23177	down	AF134894	SWAP70	SWAP switching B-cell complex 70kDa subunit	NM_015055 // Q9UH65 /// NM_015055 // B3KUB9 /// AF134894 // Q9UH65 /// AF134894 // B3KUB9	3319997
0.021165	1.23119	down	BC008803|U71207|AK293032|AY705349|BT006682|AF387364|AK093582|AF455149|AF455150|AK021909	EYA2	eyes absent homolog 2 (Drosophila)	NM_005244 // O00167 /// NM_005244 // O60647 /// NM_172110 // O00167 /// NM_172110 // O60647 /// BC008803 // O00167 /// BC008803 // O60647 /// U71207 // O00167 /// U71207 // O60647 /// AK293032 // A8KAG7 /// AK293032 // O00167 /// AK293032 // O60647 /// AY705349 // Q66T69 /// AY705349 // O00167 /// AY705349 // O60647 /// BT006682 // O00167 /// BT006682 // O60647 /// AF387364 // Q96J96 /// AF387364…	3887479
0.0446593	1.23025	down	U59464	PTCH1	patched homolog 1 (Drosophila)	NM_001083602 // A3KBI9 /// NM_001083602 // Q5R1U9 /// NM_001083602 // Q5R1V0 /// NM_001083603 // A3KBI9 /// NM_001083603 // Q5R1U9 /// NM_001083603 // Q5R1V0 /// NM_001083606 // A3KBI9 /// NM_001083606 // Q5R1U9 /// NM_001083606 // Q5R1V0 /// NM_001083605 // A3KBI9 /// NM_001083605 // Q5R1U9 /// NM_001083605 // Q5R1V0 /// NM_001083604 // A3KBI9 /// NM_001083604 // Q5R1U9 /// NM_001083604 // Q5R1V…	3215851
0.0452027	1.22983	down	AB096248	SIK2	salt-inducible kinase 2	NM_015191 // Q9H0K1 /// AB096248 // Q9H0K1	3348608
0.038135	1.22704	down	AK291430|AK303048|AK304116|BC150611|BC144479|BC082258|AK293929|AK295129|BC006456|AK125147|AK055424|BC039561|AK126291|AL050279	FAM21C|FAM21A|FAM21B|FAM21D|LOC100134102	family with sequence similarity 21, member C | family with sequence similarity 21, member A | family with sequence similarity 21, member B | family with sequence similarity 21, member D | hypothetical protein LOC100134102	NM_015262 // Q9Y4N4 /// NM_015262 // Q9Y4E1 /// NM_015262 // Q9NVB8 /// NM_015262 // B3KMC4 /// NM_015262 // Q641Q2 /// NM_015262 // Q6P0Q7 /// NM_015262 // B4DPK9 /// NM_001169106 // Q9Y4N4 /// NM_001169106 // Q9Y4E1 /// NM_001169106 // Q9NVB8 /// NM_001169106 // B3KMC4 /// NM_001169106 // Q641Q2 /// NM_001169106 // Q6P0Q7 /// NM_001169106 // B4DPK9 /// NM_001169107 // Q9Y4N4 /// NM_001169107 //…	3244742
0.0351513	1.22666	up	AK127868	TWF1	twinfilin, actin-binding protein, homolog 1 (Drosophila)	NM_002822 // Q12792 /// AK127868 // Q12792	3451708
0.0159935	1.22661	up	AK294933	CYP26B1	cytochrome P450, family 26, subfamily B, polypeptide 1	NM_019885 // Q9NR63 /// AK294933 // B7Z2P4	2559189
0.0277562	1.22539	down	AK124006	PLSCR3	phospholipid scramblase 3	NM_020360 // B2RBF8 /// NM_020360 // Q9NRY6	3743701
0.0377439	1.22529	down	AK027597	LHX2	LIM homeobox 2	NM_004789 // P50458 /// AK027597 // B3KNJ5 /// AK027597 // P50458	3188656
0.0485128	1.2238	up	M60315	BMP6	bone morphogenetic protein 6	NM_001718 // A1L1B5 /// NM_001718 // A4FU97 /// NM_001718 // A4FU96 /// NM_001718 // Q4JCQ2 /// NM_001718 // Q4VBA3 /// M60315 // P22004 /// M60315 // A1L1B5 /// M60315 // A4FU97 /// M60315 // A4FU96 /// M60315 // Q4JCQ2 /// M60315 // Q4VBA3	2893895
0.00763563	1.222	up	X79204	ATXN1	ataxin 1	X79204 // P54253	2943434
0.0370692	1.22102	up	BC028352	TBC1D15	TBC1 domain family, member 15	NM_022771 // Q9NSR4 /// NM_022771 // Q8TC07 /// NM_001146214 // Q9NSR4 /// NM_001146214 // Q8TC07 /// NM_001146213 // Q9NSR4 /// NM_001146213 // Q8TC07 /// NR_027449 // Q9NSR4 /// NR_027449 // Q8TC07 /// BC028352 // Q8TC07 /// BC028352 // Q9NSR4	3422326
0.0399219	1.22053	up	X95701	GATA6	GATA binding protein 6	NM_005257 // Q05CA6 /// X95701 // Q92908 /// X95701 // Q05CA6	3781245
0.0197272	1.21828	down	AF106912	IL27RA	interleukin 27 receptor, alpha	AF106912 // Q6UWB1	3822551
0.045886	1.21768	down	BC064693	AUTS2	autism susceptibility candidate 2	NM_015570 // Q8WXX7 /// NM_001127231 // Q8WXX7 /// BC064693 // Q8WXX7	3006572
0.0125198	1.21636	down	AF329403|BC050629|AK294280|AF329402|BC035348|AK300105|AK301728|BX649159|AL832156	CPEB1	cytoplasmic polyadenylation element binding protein 1	NM_001079535 // Q9BZB8 /// NM_001079533 // Q9BZB8 /// NM_001079534 // Q9BZB8 /// AF329403 // Q9BZB8 /// BC050629 // Q9BZB8 /// AK294280 // B7Z237 /// AF329402 // Q9BZB8 /// BC035348 // Q9BZB8 /// AK300105 // Q9BZB8 /// AK301728 // B4DWY2 /// AK301728 // Q9BZB8	3636169
0.0285849	1.21626	down	AK090965	DBNDD1	dysbindin (dystrobrevin binding protein 1) domain containing 1	NM_001042610 // Q9H9R9	3705151
0.0207313	1.21515	down	AF178941|AF327657|AK295489|BC109244|BC144588|AB177854|U18235|AK226112|BC029282|BC090860	ABCA2	ATP-binding cassette, sub-family A (ABC1), member 2	NM_001606 // Q9BZC7 /// NM_001606 // Q9UPU0 /// NM_001606 // Q6P2G5 /// NM_001606 // Q96HC2 /// NM_001606 // Q13039 /// NM_212533 // Q9BZC7 /// NM_212533 // Q9UPU0 /// NM_212533 // Q6P2G5 /// NM_212533 // Q96HC2 /// NM_212533 // Q13039 /// AF178941 // Q9HC28 /// AF178941 // Q9BZC7 /// AF178941 // Q9UPU0 /// AF178941 // Q6P2G5 /// AF178941 // Q96HC2 /// AF178941 // Q13039 /// AF327657 // Q9HC28 //…	3230610
0.01995	1.21491	up	BC062306	STRAP	serine/threonine kinase receptor associated protein	NM_007178 // Q9Y3F4 /// BC062306 // Q9Y3F4	3406421
0.0499645	1.21474	down	AK090922	PTRH1	peptidyl-tRNA hydrolase 1 homolog (S. cerevisiae)		3226005
0.0469434	1.21396	down	BC038950	APOL6	apolipoprotein L, 6	NM_030641 // Q9BWW8 /// NM_030641 // Q8NCM1 /// NM_030641 // B3KTP4 /// BC038950 // Q9BWW8 /// BC038950 // Q8NCM1 /// BC038950 // B3KTP4	3944243
0.0470823	1.21175	up	AK293009	HIPK3	homeodomain interacting protein kinase 3	NM_005734 // Q9H422 /// NM_001048200 // Q9H422	3325907
0.0267182	1.20742	up	AK289854	PTPN11	protein tyrosine phosphatase, non-receptor type 11	NM_002834 // Q96I26 /// NM_002834 // B3GUD4 /// NM_002834 // B3GUD3 /// NM_002834 // Q06124 /// NM_002834 // Q16344 /// AK289854 // Q06124 /// AK289854 // Q96I26 /// AK289854 // B3GUD4 /// AK289854 // B3GUD3 /// AK289854 // Q16344	3432333
0.00915959	1.20717	down	AY295082	WDR25	WD repeat domain 25	NM_001161476 // Q64LD2 /// AY295082 // Q64LD2	3551935
0.0267096	1.20689	down	AY304516	LPPR2	lipid phosphate phosphatase-related protein type 2	NM_022737 // Q96GM1 /// NM_001170635 // Q96GM1 /// AY304516 // Q96GM1	3821159
0.0175323	1.20663	down	AY216715	RASSF4	Ras association (RalGDS/AF-6) domain family member 4	NM_032023 // Q9H2L5 /// AY216715 // Q9H2L5	3244488
0.0258286	1.20532	down	AL832161			AL832161 // Q9HAA7	4053986
0.0196981	1.20293	down	J03925|AK074047	ITGAM|ITGAX	integrin, alpha M (complement component 3 receptor 3 subunit) | integrin, alpha X (complement component 3 receptor 4 subunit)	NM_001145808 // B3KXM6 /// NM_001145808 // P11215 /// NM_000632 // B3KXM6 /// NM_000632 // P11215 /// J03925 // P11215 /// J03925 // B3KXM6 /// AK074047 // Q8TES5	3656990
0.0203263	1.20162	down	BC016793|BC004445|BC010092|AK295072	FUZ	fuzzy homolog (Drosophila)	NM_025129 // Q9BT04 /// NR_033269 // Q9BT04 /// NM_001171937 // Q9BT04 /// BC016793 // Q9BT04 /// BC004445 // Q9BT04 /// BC010092 // Q9BT04 /// AK295072 // B4DHF8	3868064
0.0171106	1.20117	up	AK294876	PER2	period homolog 2 (Drosophila)	NM_022817 // O15055 /// AK294876 // B4DH14	2605749
0.033576	1.20015	up	BC130443	MUM1	melanoma associated antigen (mutated) 1	NR_024247 // Q9P0R5 /// NR_024247 // Q2TAK8 /// NR_024247 // Q9H6H2 /// NM_032853 // Q9P0R5 /// NM_032853 // Q2TAK8 /// NM_032853 // Q9H6H2 /// BC130443 // Q2TAK8 /// BC130443 // Q9P0R5 /// BC130443 // Q9H6H2	3815757
0.0304637	1.19752	down	AK126536	TSKU	tsukushi small leucine rich proteoglycan homolog (Xenopus laevis) | tsukushin	NM_015516 // Q8WUA8 /// NM_015516 // B3KRF9 /// AK126536 // Q8WUA8	3341024
0.0128878	1.19692	up	BC105810|AK289671	RPS15|NDUFS7	ribosomal protein S15 | NADH dehydrogenase (ubiquinone) Fe-S protein 7, 20kDa (NADH-coenzyme Q reductase)	BC105810 // P62841 /// AK289671 // A8K0V6	3815726
0.0331835	1.19608	down	AF052504	EVL	Enah/Vasp-like	AF052504 // Q9UI08	3551566
0.00147966	1.19605	down	U87223	CNTNAP1	contactin associated protein 1	U87223 // P78357	3721989
0.0367175	1.19233	down	DQ063579	SLC4A8	solute carrier family 4, sodium bicarbonate cotransporter, member 8	NM_001039960 // Q2Y0W8 /// DQ063579 // Q2Y0W8	3414885
0.0171106	1.19133	down	AB019527	LDOC1	leucine zipper, down-regulated in cancer 1	AB019527 // O95751	4024420
0.0203263	1.18743	down	AB005666	SIPA1	signal-induced proliferation-associated 1	AB005666 // Q96FS4	3335465
0.00908791	1.18641	up	AY189689	LDHB	lactate dehydrogenase B	NM_002300 // Q5U077 /// NM_002300 // O95817 /// NM_002300 // P07195 /// AY189689 // Q5U077 /// AY189689 // O95817 /// AY189689 // P07195	3446868
0.043166	1.18618	down	AF196478	ANXA10	annexin A10	NM_007193 // Q9UJ72 /// AF196478 // Q9UJ72	2751009
0.0229673	1.18032	up	AK128515	TXNRD1	thioredoxin reductase 1	NM_003330 // B2R5P6 /// NM_003330 // Q16881 /// NM_182742 // B2R5P6 /// NM_182742 // Q16881 /// NM_182729 // B2R5P6 /// NM_182729 // Q16881 /// NM_182743 // B2R5P6 /// NM_182743 // Q16881 /// AK128515 // Q6ZR44 /// AK128515 // Q16881	3429460
0.0163635	1.17935	down	BC036364	BID	BH3 interacting domain death agonist	NM_197966 // B1PL87 /// NM_197966 // B3KT21 /// BC036364 // P55957 /// BC036364 // B1PL87 /// BC036364 // B3KT21	3951927
0.0282267	1.17863	up	AK098233	UBE2N|UBE2NL	ubiquitin-conjugating enzyme E2N (UBC13 homolog, yeast) | ubiquitin-conjugating enzyme E2N-like		3465791
0.0224214	1.17714	down	AK096756	MRPL21	mitochondrial ribosomal protein L21		3379708
0.0332672	1.17581	down	AK090468	TRAF1	TNF receptor-associated factor 1	NM_005658 // Q658U1 /// AK090468 // Q13077 /// AK090468 // Q658U1	3223738
0.0135423	1.17566	up	BC086875	FAM13A	family with sequence similarity 13, member A	NM_001015045 // O94988 /// NM_014883 // O94988 /// BC086875 // O94988	2777487
0.0401326	1.17062	down	AK074053	MRPL46	mitochondrial ribosomal protein L46	NM_022163 // Q9H2W6 /// AK074053 // Q8TER9	3638048
0.038135	1.1703	down	AF230402	PML	promyelocytic leukemia	NM_033240 // Q15959 /// NM_033244 // Q15959 /// NM_033239 // Q15959 /// NM_033250 // Q15959 /// NM_033238 // Q59FP9 /// NM_033238 // A4VCI9 /// NM_002675 // P29590 /// NM_033249 // P29590 /// NM_033246 // P29590 /// NM_033247 // Q15959 /// AF230402 // Q9BZY3 /// AF230402 // Q15959	3601387
0.0430111	1.17016	down	M14113	F8	coagulation factor VIII, procoagulant component	NM_000132 // A8KA37 /// NM_000132 // P00451 /// NM_019863 // Q14286 /// M14113 // P00451 /// M14113 // A8KA37	4027639
0.0333191	1.16542	down	AY550194|AY672100	TMEM220|MAGOH2	transmembrane protein 220 | mago-nashi homolog 2, proliferation-associated (Drosophila)	AY550194 // Q6QAJ8	3745525
0.0485697	1.16308	down	DQ642016	DIXDC1	DIX domain containing 1	NM_001037954 // B3KP10 /// NM_001037954 // Q155Q3 /// NM_033425 // Q155Q3 /// DQ642016 // Q155Q3 /// DQ642016 // B3KP10	3348790
0.0258286	1.16301	up	BC034580	SLC44A5	solute carrier family 44, member 5	NM_001130058 // Q8NCS7 /// BC034580 // Q8NCS7	2418570
0.00995739	1.16101	down	BC150176	DAGLA	diacylglycerol lipase, alpha	NM_006133 // Q9Y4D2 /// BC150176 // Q9Y4D2	3333116
0.038135	1.15964	down	BC113584	DMRT3	doublesex and mab-3 related transcription factor 3	NM_021240 // Q9NQL9 /// BC113584 // Q9NQL9	3159735
0.0333094	1.15897	up	AF078164	XRCC6BP1	XRCC6 binding protein 1	AF078164 // Q9Y6H3	3418610
0.0446593	1.1569	down	BC095431	BAD	BCL2-associated agonist of cell death	NM_004322 // Q6FH21 /// NM_004322 // Q92934 /// NM_032989 // Q6FH21 /// NM_032989 // Q92934 /// BC095431 // Q6FH21	3376832
0.0124003	1.15623	down	BC010854	APBB1	amyloid beta (A4) precursor protein-binding, family B, member 1 (Fe65)	NM_001164 // Q8TEY4 /// NM_145689 // Q8TEY4 /// BC010854 // O00213	3360826
0.0374614	1.15552	up	BC038805	EBF1	early B-cell factor 1	NM_024007 // Q9UH73 /// BC038805 // Q9UH73	2883878
0.0221556	1.15137	down	BC002410	FAM127A	family with sequence similarity 127, member A	NM_001078171 // O15255 /// BC002410 // O15255 /// BC002410 // A6ZKI3	3991889
0.049652	1.15132	down	BC014002	ZNF358	zinc finger protein 358	NM_018083 // Q9NW07 /// BC014002 // Q9NW07	3818842
0.038135	1.14643	down	BC058906	ADCK1	aarF domain containing kinase 1	NM_020421 // Q86TW2 /// NM_020421 // B3KUD5 /// NM_001142545 // Q86TW2 /// NM_001142545 // B3KUD5 /// BC058906 // Q86TW2 /// BC058906 // B3KUD5	3545564
0.0142129	1.13963	down	BC004199	RLBP1	retinaldehyde binding protein 1	NM_000326 // P12271 /// BC004199 // P12271	3638303
0.0461556	1.13386	down	AY358328	BOC	Boc homolog (mouse)	AY358328 // Q9BWV1	2636319
0.0467782	1.13035	down	BC031224	NUDT13	nudix (nucleoside diphosphate linked moiety X)-type motif 13	NM_015901 // Q86X67 /// BC031224 // Q4G134 /// BC031224 // Q86X67	3251619
0.0472579	1.12814	down	AB071179|AF385931|DQ181796|AY112983|AY112984|AY112985|AF210730|BC032597|AK300444|AY312514|AK294963|AF075088|AK130420|AK091189|AY243319|AY243321|AY243314|AY243317|AY243322|AY243316	NEDD4L	neural precursor cell expressed, developmentally down-regulated 4-like	NM_001144967 // Q96PU5 /// NM_001144967 // Q5XLQ3 /// NM_015277 // Q96PU5 /// NM_015277 // Q5XLQ3 /// NM_001144965 // Q96PU5 /// NM_001144965 // Q5XLQ3 /// NM_001144968 // Q96PU5 /// NM_001144968 // Q5XLQ3 /// NM_001144966 // Q96PU5 /// NM_001144966 // Q5XLQ3 /// NM_001144969 // Q96PU5 /// NM_001144969 // Q5XLQ3 /// NM_001144970 // Q96PU5 /// AB071179 // Q96PU5 /// AB071179 // Q5XLQ3 /// AF385931…	3789947
0.0309691	1.12596	down	AB209203	SLC9A5	solute carrier family 9 (sodium/hydrogen exchanger), member 5	AB209203 // Q59GA6 /// AB209203 // Q9NSW9	3665374
0.0478948	1.12497	down	BC002469|AY358436|AK301712	C1orf56	chromosome 1 open reading frame 56	BC002469 // Q9BUN1 /// AY358436 // Q9BUN1 /// AK301712 // B4DWX1	2358671
0.010133	1.12169	down	AK125716	PRR14	proline rich 14	NM_024031 // Q9BWN1 /// NM_024031 // Q96D88	3656318
0.00945622	1.11943	up	BC030974|AF016492	UGT2B7|UGT2B11|UGT2B28	UDP glucuronosyltransferase 2 family, polypeptide B7 | UDP glucuronosyltransferase 2 family, polypeptide B11 | UDP glucuronosyltransferase 2 family, polypeptide B28	NM_001074 // P16662 /// NM_001074 // Q99912 /// BC030974 // P16662 /// BC030974 // Q99912 /// AF016492 // O75310	2729929
0.0218941	1.11801	down	AK125656	SS18L1	synovial sarcoma translocation gene on chromosome 18-like 1	NM_198935 // O75177 /// AK125656 // O75177	3892456
0.0390193	1.113	down	AK022481	PIAS4	protein inhibitor of activated STAT, 4	AK022481 // B3KMR4 /// AK022481 // Q8N2W9 /// AK022481 // Q53H55	3817256
0.0348083	1.11253	down	X98654	PITPNM1	phosphatidylinositol transfer protein, membrane-associated 1	NM_004910 // B2R787 /// NM_001130848 // B2R787 /// X98654 // O00562	3378895
0.0247169	1.11054	down	AF390028	CDKL1	cyclin-dependent kinase-like 1 (CDC2-related kinase)	AF390028 // Q8WXQ5	3563861
0.0367143	1.09877	down	BC017096	ALKBH4|ORAI2	alkB, alkylation repair homolog 4 (E. coli) | ORAI calcium release-activated calcium modulator 2	NM_017621 // Q9NXW9 /// NM_001126340 // Q96SN7 /// NM_001126340 // Q9H9Y3 /// NM_032831 // Q96SN7 /// NM_032831 // Q9H9Y3 /// BC017096 // Q9NXW9	3065007
